1 **Title**

2 **BTK operates a phospho-tyrosine switch to**  
3 **regulate NLRP3 inflammasome activity**

4 **Authors**

5 Zsófia A. Bittner<sup>a,§</sup>, Xiao Liu<sup>a</sup>, Sabine Dickhöfer<sup>a</sup>, Hubert Kalbacher<sup>b</sup>, Karlotta Bosch<sup>a</sup>, Liudmila  
6 Andreeva<sup>c,d</sup>, Sangeetha Shankar<sup>a</sup>, Ana Tapia-Abellán<sup>a</sup>, Ana Marcu<sup>a</sup>, Stefan Stevanovic<sup>a</sup>, Matthew  
7 Mangan<sup>e,f</sup>, Peter Düwell<sup>e</sup>, Marta Lovotti<sup>e</sup>, Franziska Herster<sup>a</sup>, Markus W. Löffler<sup>a,g,h,i</sup>, Olaf-Oliver  
8 Wolz<sup>a,§</sup>, Nadine A. Schilling<sup>j</sup>, Jasmin Kümmerle-Deschner<sup>k</sup>, Samuel Wagner<sup>l</sup>, Anita Delor<sup>m</sup>, Bodo  
9 Grimbacher<sup>m,n,o,p,q</sup>, Hao Wu<sup>c,d</sup>, Eicke Latz<sup>e,r</sup>, Alexander N. R. Weber<sup>a,i,\*</sup>

10 **Affiliations**

11 <sup>a</sup> Interfaculty Institute for Cell Biology, Department of Immunology, University of Tübingen, Auf der  
12 Morgenstelle 15, 72076 Tübingen, Germany

13 <sup>b</sup> Interfaculty Institute of Biochemistry, University of Tübingen, Hoppe-Seyler-Str. 4, 72076 Tübingen,  
14 Germany

15 <sup>c</sup> Department of Biological Chemistry and Molecular Pharmacology, Harvard Medical School, 240  
16 Longwood Avenue, C-213, Boston, MA 02115, USA

17 <sup>d</sup> Program in Cellular and Molecular Medicine, Boston Children's Hospital, 3 Blackfan Circle, Boston,  
18 MA 02115, USA

19 <sup>e</sup> Institute of Innate Immunity, University Hospital Bonn, Sigmund-Freud-Str. 25, 53127 Bonn,  
20 Germany

21 <sup>f</sup> German Center for Neurodegenerative Diseases (DZNE), Bonn, Germany.

22 <sup>g</sup> Department of General, Visceral and Transplant Surgery, University Hospital Tübingen, Hoppe-  
23 Seyler-Str. 3, 72076 Tübingen, Germany

24 <sup>h</sup> Department of Clinical Pharmacology, University Hospital Tübingen, Auf der Morgenstelle 8, 72076  
25 Tübingen, Germany

26 <sup>i</sup> iFIT – Cluster of Excellence (EXC 2180) "Image-Guided and Functionally Instructed Tumor Therapies",  
27 University of Tübingen, Germany

28 <sup>j</sup> Institute of Organic Chemistry, University of Tübingen, Auf der Morgenstelle 18, 72076 Tübingen,  
29 Germany

30 <sup>k</sup> Department of Pediatrics I, University Hospital Tübingen, Hoppe-Seyler-Str. 1, 72076 Tübingen,  
31 Germany

32 <sup>l</sup> Interfaculty Institute of Microbiology and Infection Medicine, University of Tübingen, Elfriede-  
33 Aulhorn-Str. 6, 72076 Tübingen, Germany

34 <sup>m</sup> Centre of Chronic Immunodeficiency, University Hospital Freiburg, Engesserstr. 4, 79108 Freiburg,  
35 Germany

36 <sup>n</sup> Institute for Immunodeficiency, Center for Chronic Immunodeficiency (CCI), Medical Center, Faculty  
37 of Medicine, Albert-Ludwigs-University of Freiburg, Germany

38 <sup>o</sup> DZIF – German Center for Infection Research, Satellite Center Freiburg, Germany

39 <sup>p</sup> CIBSS – Centre for Integrative Biological Signalling Studies, Albert-Ludwigs University, Freiburg,  
40 Germany

41 <sup>q</sup> RESIST – Cluster of Excellence 2155 to Hanover Medical School, Satellite Center Freiburg, Germany

42 <sup>r</sup> Division of Infectious Diseases & Immunology, University of Massachusetts, 364 Plantation St,  
43 Worcester, MA 01605, USA

#### 44 **Contact information**

45 \* to whom correspondence should be addressed: Alexander Weber; Interfaculty Institute for Cell  
46 Biology, Department of Immunology, University of Tübingen, Auf der Morgenstelle 15, 72076

47 Tübingen, Germany; Tel. +49 7071 2987623; Fax. +49 7071 294759;  
48 [alexander.weber@uni.tuebingen.de](mailto:alexander.weber@uni.tuebingen.de)

49 <sup>§</sup> Current address: CureVac AG, Paul-Ehrlich-Straße 15, 72076 Tübingen, Germany.

50 <sup>§</sup> Current address: Department of Biology, Institute of Molecular Health Sciences, ETH Zürich, Zürich,  
51 Switzerland

## 52 **Funding**

53 The study was supported by the Else-Krüner-Fresenius Stiftung (to ANRW), the Deutsche  
54 Forschungsgemeinschaft (German Research Foundation, DFG) grants CRC TR156 “The skin as an  
55 immune sensor and effector organ – Orchestrating local and systemic immunity” (to ZSB, FH and  
56 ANRW) and We-4195/15-1 (to ANRW), University Hospital Tübingen (Fortüne Grant 2310-0-0 to XL  
57 and ANRW), IFM Therapeutics (to ANRW), the “E-rare” program of the European Union, managed by  
58 the DFG, grant code GR1617/14-1/iPAD (to BG), and the „Netzwerke Seltener Erkrankungen“ of the  
59 German Ministry of Education and Research (BMBF, GAIN\_ 01GM1910A, to BG) and the Damon  
60 Runyon Cancer Research Foundation (to LA). Infrastructural funding was provided by the University  
61 of Tübingen, the University Hospital Tübingen and the DFG Clusters of Excellence "iFIT – Image-  
62 Guided and Functionally Instructed Tumor Therapies" (EXC 2180, to AW), “CMFI – Controlling  
63 Microbes to Fight Infection (EXC 2124, to AW), “CIBSS – Centre for Integrative Signalling Studies”  
64 (EXC 2189, to BG) and “RESIST – Resolving Infection Susceptibility” (EXC 2155, to BG). Gefördert  
65 durch die Deutsche Forschungsgemeinschaft (DFG) im Rahmen der Exzellenzstrategie des Bundes  
66 und der Länder - EXC 2180 (390900677), EXC 2124, EXC 2189 (390939984) and EXC 2155 (39087428).

67

68

69 **Abstract**

70 Inflammation is required for host defense as well as wound healing but wields enormous destructive  
71 potential, highlighting the need for multiple ‘checks and balances’ (1). The NLRP3 inflammasome, a  
72 pivotal molecular machine for the maturation of IL-1 family pro-inflammatory cytokines (1), is  
73 controlled by accessory proteins (2, 3), post-translational modifications (4, 5), localization (6, 7) and  
74 oligomerization (8). How these factors act in concert is unclear. We show that the established drug  
75 target and NLRP3 regulator, Bruton’s Tyrosine Kinase (BTK) (2, 9), integrates several levels of  
76 regulation to boost inflammasome activity: by directly phosphorylating four conserved tyrosine  
77 residues in the polybasic linker region of NLRP3, BTK weakens the interaction of NLRP3 with Golgi  
78 phospholipids and may thus guide NLRP3 localization. BTK activity also promotes NLRP3  
79 oligomerization and subsequent formation of inflammasomes. As NLRP3 tyrosine modification  
80 impacts on IL-1 $\beta$  release, we propose a novel BTK- and charge-mediated molecular phospho-switch  
81 to contribute to NLRP3 regulation. Collectively, our study highlights BTK as a ‘multi-layer regulator’ of  
82 the inflammasome and NLRP3 multi-tyrosine phosphorylation as a therapeutic target for restricting  
83 excess inflammation.

84 **Keywords**

85 NLRP3 inflammasome, Bruton’s Tyrosine Kinase (BTK), Interleukin-1, Inflammation, Ibrutinib,  
86 Macrophage, X-linked agammaglobulinemia, Cryopyrin-associated periodic syndrome (CAPS).

## 87 **Introduction**

88 Inflammation mediated via the NLRP3 inflammasome supports the resolution of infections and  
89 sterile insults but also contributes to pathology in multiple human diseases such as Cryopyrin-  
90 associated periodic fever syndromes (CAPS), gout, stroke or Alzheimer's disease, and atherosclerosis  
91 (10, 11). Thus, the activity of the NLRP3 inflammasome, a molecular machine maturing IL-1 family  
92 cytokines via the activity of caspase-1, is tightly controlled at several levels: At the structural level,  
93 recent cryo-EM studies demonstrated that the 3D conformation of NLRP3 is critical for NLRP3  
94 oligomerization and may depend on ADP/ATP binding (8). In addition, NLRP3 binding proteins, such  
95 as NEK7, have been shown to have an impact on inflammasome activity (3, 12). Moreover, post-  
96 translational modifications of NLRP3 enhance or reduce its activity by only partially elucidated  
97 mechanisms (5). Finally, NLRP3 interacts dynamically with subcellular organelles such as the trans-  
98 Golgi network (TGN): Whilst a polybasic region in the linker connecting the NLRP3 pyrin (PYD) and  
99 NACHT domains appears to control phosphatidylinositol-4-phosphate (PtdIns4P)-dependent  
100 tethering of NLRP3 at the disperse TGN (6), dissociation from the TGN into the cytosol was proposed  
101 a requirement for the nucleation of larger NLRP3 oligomers and, subsequently, the assembly of the  
102 complete inflammasome complexes, including ASC and caspase-1 (7). The cues instigating this shift in  
103 localization are not well understood. How these multiple layers of NLRP3 regulation are related or  
104 even integrated at the cellular as well as at the molecular level remains unclear. If individual  
105 regulators were to provide this integration, they could be valuable targets to modulate  
106 inflammasome activity.

107 We and others have recently identified Bruton's tyrosine kinase (BTK) as a novel and therapeutically  
108 relevant NLRP3 regulator (2, 13), which is rapidly activated upon NLRP3 inflammasome stimulation,  
109 and interacts with NLRP3 and ASC in overexpression systems. Its genetic ablation led to reduced IL-  
110 1 $\beta$  secretion *in vitro* and, importantly, in human patients *ex vivo* (2). BTK is a well-known cancer  
111 target for which FDA-approved inhibitors such as ibrutinib exist (reviewed in Ref. (9)). Based on the

112 molecular mechanisms and chronic inflammatory processes observed in the pathology of many  
113 cancers, targeting NLRP3 via BTK also appears as an attractive therapeutic option in other diseases.

114 Here we report that BTK directly modifies NLRP3 at four tyrosine residues in the PYD-NACHT  
115 polybasic linker, affecting its ability to bind PI4P and localize at the Golgi. Consequently, ablation of  
116 BTK kinase activity or tyrosine mutation decreased the formation of NLRP3 oligomers and IL-1 $\beta$   
117 release, respectively. Our data suggest that this BTK-mediated phospho-tyrosine switch affects the  
118 activity of NLRP3 by modifying the charge of the PYD-NACHT polybasic linker and, consequently,  
119 altering its subcellular localization. BTK thus emerges as an important regulation hub for the  
120 activation of the NLRP3 inflammasome at multiple levels.

## 121 **Results**

### 122 **BTK deficiency coincides with reduced NLRP3 tyrosine phosphorylation**

123 Based on previous work (2), we hypothesized that BTK and NLRP3 may engage in a direct kinase-  
124 substrate relationship, whose elucidation might unravel novel molecular aspects of NLRP3  
125 inflammasome regulation. We sought to test this in *Btk*-deficient primary murine BMDMs and in  
126 PBMCs from patients with the genetic *BTK* deficiency, X-linked agammaglobulinemia (XLA). As  
127 expected, IL-1 $\beta$  release upon nigericin stimulation was significantly reduced in BTK-deficient BMDMs  
128 and patient-derived PBMC, respectively (Fig. 1A, B). Interestingly, in BMDMs, endogenous NLRP3  
129 precipitated and interacted with endogenous BTK in WT but not *Btk* or *Nlrp3* KO BMDM (Fig. 1C),  
130 irrespective of the BTK kinase inhibitor ibrutinib. Similarly, BTK co-immunoprecipitated with NLRP3 in  
131 PBMCs from healthy donors (HDs) (Fig. 1D). Thus, in both human and murine primary immune cells  
132 BTK and NLRP3 interact constitutively and independently of nigericin stimulation. This was also  
133 confirmed with a cell-free *in vitro* pull-down of recombinant purified NLRP3 and BTK proteins (Fig. 1E,  
134 Ref. (8) and Methods). We next tested whether BTK is able to phosphorylate NLRP3 upon nigericin  
135 treatment. In murine BMDMs (Fig. 1F) immunoprecipitated NLRP3 became rapidly phospho-tyrosine  
136 (p-Y)-positive, in cells expressing *Btk* but not in *Btk* or *Nlrp3* KO cells. Similarly, NLRP3  
137 phosphorylation was also observed in healthy donor PBMCs (Fig. 1G), and lower in XLA PBMCs (Fig.

138 S1A). Importantly, treatment with  $\lambda$ -phosphatase abolished p-Y reactivity, further confirming the  
139 phospho-antibody specificity. Thus, BTK and NLRP3 interact endogenously in primary immune cells  
140 and BTK promotes NLRP3 tyrosine-phosphorylation upon nigericin stimulation.

#### 141 **BTK kinase activity is required for NLRP3 tyrosine phosphorylation**

142 We next tested whether BTK kinase activity was required for NLRP3 tyrosine phosphorylation. Two  
143 independent cell-free *in vitro* setups showed that the presence of BTK was necessary and sufficient  
144 for NLRP3 p-Y modification (Figs. 1H and S1B). However, in both PBMC and the *in vitro* setup NLRP3  
145 tyrosine phosphorylation was blocked by ibrutinib treatment (Figs. 1I and S1B) and, thus, dependent  
146 on BTK kinase activity. Next, HEK293T cells were transfected with NLRP3 and BTK, and treated with  
147 or without BTK inhibitors. NLRP3 and BTK interacted independently of BTK kinase inhibitors, ibrutinib  
148 and acalabrutinib; however, NLRP3 tyrosine phosphorylation was abrogated in the presence of both  
149 BTK kinase inhibitors (Fig. 1J), consistent with results in primary BMDM (*cf.* Fig. 1C). In contrast, the  
150 NLRP3-specific inhibitor, MCC950 (14), failed to prevent BTK-specific interaction and NLRP3 p-Y  
151 positivity (Fig. 1J). Interestingly, the expression of kinase-dead (KD) BTK (K430E mutation, see Ref.  
152 (9)) was not able to induce NLRP3 tyrosine phosphorylation, despite an intact interaction (Fig. 1K).  
153 Similar results were obtained in the *in vitro* cell-free setup (*cf.* Fig. S1B). Thus BTK kinase activity  
154 emerged as essential and sufficient for NLRP3 p-Y modification using primary immune cells, the  
155 HEK293T system or purified recombinant proteins, indicative of a direct kinase-substrate  
156 relationship.

#### 157 **BTK phosphorylates four conserved tyrosine residues in the NLRP3 PYD-NACHT linker** 158 **domain**

159 To map the modified tyrosine residues in NLRP3, we compared Flag-tagged full-length with truncated  
160 NLRP3 constructs (15) of only the PYD (1-93), the extended NACHT domain (94-534), which includes  
161 an N-terminal linker domain (94-219) (8), and the LRR domain (535-1,036). BTK exclusively  
162 phosphorylated the NLRP3 extended NACHT construct (Fig. 2B, C), ruling out Y816 (5) as the  
163 phospho-site. Mutation of the nine tyrosines in the core NACHT domain (220-534, (Fig. 2D) to

164 phenylalanine (F) did not impact the level of phospho-NLRP3 detected upon BTK co-expression (Fig.  
165 S3A, quantified in S3B). However, when the linker (94-219) tyrosines were targeted (Fig. 2E), mutated  
166 Y168 showed partial but significant reduction of the p-Y signal, as shown by conventional  
167 immunoblotting (Fig. 2F, quantified in G) and WES capillary electrophoresis analysis (Fig. 2H,  
168 quantified in S3C), respectively. Thus, Y168 emerged as a novel putative phospho-tyrosine site in  
169 NLRP3, specifically modified by BTK. Unfortunately, the linker region is not accessible to mass  
170 spectrometric analysis (data from (16) plotted in Fig. S3D). Therefore, to assess the phosphorylation  
171 of Y168 by alternative means, 15-mer peptides covering all linker tyrosines (*cf.* Fig 2E and Table S1)  
172 were incubated with His-tagged BTK to assess peptide phosphorylation in a cell-free system.  
173 Following BTK removal by anti-His beads, p-Y phosphorylation of the peptides was visualized by dot  
174 blot analysis. While the majority of Y-containing peptides and all F-containing corresponding peptides  
175 were not phosphorylated (Fig. S3E), the Y168-containing peptide showed strong tyrosine  
176 modification (Fig. 2I). Of note, peptides containing Y136, Y140, or Y143 – either in combination or as  
177 single tyrosines – were also phosphorylated (Fig. 2I), similar to peptides containing the sequences in  
178 mouse NLRP3 (Y132, Y136, Y145 and Y164, see Fig. S3F). In HEK293T cells, combined mutations of  
179 Y136, Y140, Y143 (“3Y>F”) and additionally Y168 to phenylalanine (“4Y>F”) consequently led to a  
180 strong reduction of the p-Y signal, both in a FL-NLRP3 construct and when the linker was fused to an  
181 mCitrine yellow fluorescent protein-HA sequence (here termed ‘hLinker-Cit-HA’, Fig. 2J). Consistent  
182 with the only partial effect of a single Y168F mutation (*cf.* Fig. 2F-H), BTK appears able to specifically  
183 modify not only one, but at least four tyrosines – Y136, Y140, Y143 and Y168 – in the PYD-NACHT  
184 linker of human (and murine) NLRP3 *in vitro*.

185 To gain a structural insight, we mapped the sites in a recent cryo-EM structure of an NLRP3-NEK7  
186 complex (Ref. (8), Fig. 2K and S4A). Interestingly, Y136, Y140 and Y143 were found in a helical region  
187 proposed to contact the PYD for ASC recruitment (8). Further, Y168, which maps to the vicinity of  
188 several likely pathogenic CAPS mutations (*cf.* Fig. S2), was adjacent to a putative ADP molecule and  
189 might thus influence nucleotide binding (Fig. 2L, M). Interestingly, all of the BTK-modified Y residues



190 were strongly conserved in other NLRP3 sequences, further highlighting their potential functional  
191 relevance (Fig. S4B). Collectively, our results suggest that BTK directly modifies multiple highly  
192 conserved tyrosines within a functionally important domain in NLRP3 that could impact downstream  
193 steps in the assembly of the oligomeric inflammasome complexes.

#### 194 **BTK-mediated phosphorylation sites affect PI4P binding**

195 Chen and Chen recently identified a ‘polybasic’ motif (K127-130 in mouse; K127 and K129-130 in  
196 human NLRP3) as critical for NLRP3 charge-dependent binding to Golgi phosphatidylinositol-4-  
197 phosphates (PI4Ps) and inflammasome nucleation (6). Unexpectedly, Y136, Y140 and Y143 precisely  
198 mapped to this polybasic motif in the NLRP3 PYD-NACHT linker, and interdigitate with the basic  
199 residues mediating the proposed NLRP3 interaction with negatively charged membrane  
200 phospholipids (Fig. 3A). The mutation of three positively charged residues (K127, K129, K130) in the  
201 mNLRP3 polybasic region to alanine (K>A) is sufficient to abrogate PI4P binding (6). We therefore  
202 hypothesized that BTK phosphorylation of Y136, Y140 and Y143 might weaken the proposed charge  
203 attraction of NLRP3 with Golgi PI4Ps. (6, 7). Charge computations suggested that at cytoplasmic pH  
204 7.4, the net charge of the human NLRP3 polybasic linker sequence shifts from +7.28  
205 (unphosphorylated) to +2.01 if Y136, Y140 and Y143 are phosphorylated in (Fig. 3B), and from +8.33  
206 (unphosphorylated) to +3.06 (3x phosphorylated) for mouse NLRP3. To confirm this charge shift,  
207 synthetic phospho- and non-phospho versions of the Y136/Y140/Y143-containing peptides from both  
208 human and mouse NLRP3 were studied in pH titrations, demonstrating the phospho-Y-peptide to be  
209 significantly more acidic/negatively charged (Fig. 3C). Furthermore, in the NLRP3-NEK7 structure the  
210 3x phospho-modification is calculated to cause a significant change in the computed surface charge  
211 of a ‘hypothetically active’ NLRP3 state (8) towards negative values (Fig. S5A). We therefore  
212 hypothesized tyrosine phosphorylation by BTK might weaken interactions with the negatively  
213 charged PI4Ps. Consistently, the binding of 4xY>E, i.e. phospho-mimetic, mutant human NLRP3  
214 linker-Cit-HA fusion protein to PI4P beads (6) was reduced compared to the corresponding WT  
215 construct (Fig. 3D). This was further confirmed by the fusion of the murine NLRP3 polybasic region to

216 GFP-Flag (mPBR-GFP-Flag, construct as in Ref. (6)): Despite equal expression, the Y>E construct  
217 bound PI4P beads less strongly than WT (Fig. 3E). Reduced binding was also observed for the  
218 corresponding K>A mutant, which is known to be defective in PI4P binding based on charge  
219 neutralization (6). To test whether BTK activity might also affect Golgi localization, we fractionated  
220 different stimulated BMDM lysates into S100 (soluble, cytosol), P5 (heavy membrane, Golgi and  
221 mitochondria) and P100 (light membrane, ER and polysomes) fractions and probed them for NLRP3.  
222 BTK, whose PH domain also binds PIPs (references in (17)), was also analyzed and found to localize  
223 similarly to NLRP3 (Fig. 3F, Fig. S5B), in keeping with earlier interaction analyses (*cf.* Fig. 1C, F). As  
224 expected (6), in both WT and *Btk* KO BMDMs, NLRP3 was detectable in the P5 fraction upon LPS  
225 treatment, indicating that BTK is not essential for initial NLRP3 localization *towards* P5 membranes  
226 (Fig. 3F, Fig. S5B). However, nigericin stimulation in WT BMDM coincided with progressive depletion  
227 of NLRP3 from the P5 fraction within 20 min, consistent with the timing of phosphorylation in these  
228 cells (*cf.* Fig 1F). Conversely, *Btk* KO BMDMs did not show dissociation within this time, suggesting  
229 NLRP3 interaction with Golgi membranes remain more stable in the absence of BTK, possibly due to  
230 intact charge-mediated PI4P-interactions (6). Collectively, these experiments show that both, the  
231 BTK-modified tyrosine positions in the NLRP3 linker and the presence of BTK, have an impact on  
232 NLRP3 linker-PI4P binding and subcellular fractionation of NLRP3; most probably via affecting linker  
233 charge (*cf.* Fig. 3A, C and S5A).

### 234 **BTK kinase activity affects NLRP3 oligomerization and IL-1 $\beta$ release**

235 A recent study proposed that NLRP3 release from the Golgi was required for ASC engagement and  
236 full inflammasome assembly (7). As Golgi depletion was lower in the absence of BTK (*cf.* Fig. 3F), we  
237 explored whether BTK kinase activity also affected subsequent full inflammasome assembly, e.g. by  
238 recruiting ASC into complex formation. Indeed, native PAGE of nigericin-stimulated WT and *Btk* KO  
239 BMDM lysates (Fig. 4A) or BTK inhibitor- vs vehicle-treated *Pycard* (ASC) KO (Fig. 4B) showed reduced  
240 NLRP3 oligomers in BTK-deficient or -inhibited samples, and lower ASC cross-linking (Fig. 4C). Size  
241 exclusion chromatography of untreated WT cell lysates showed that BTK and NLRP3 co-eluted in the

242 high MW fraction (>1,100 KDa). Consistent with native PAGE in *Btk* KO or WT lysates from ibrutinib-  
243 treated cells, elution shifted to lower molecular weight complexes (Fig. 4D, E). Ablation of BTK  
244 activity, thus, appeared to reduce the subsequent ability of NLRP3 to oligomerize into large MW  
245 cytosolic inflammasomes and to assemble with ASC. To show that BTK-modified tyrosine residues -  
246 and the effects of BTK described so far - also had an impact on IL-1 $\beta$  release, NLRP3-deficient  
247 immortalized macrophages were retrovirally transduced with WT or tyrosine-mutated (4xY>F)  
248 NLRP3-T2A-mCherry constructs, allowing for cell sorting for equal protein expression (Fig. 4F).  
249 Compared to WT-transduced cells, cells with the 4xY>F construct failed to restore nigericin- and R837  
250 (imiquimod)-dependent IL-1 $\beta$  release (Fig. 4G). Conversely, TNF release, which is NLRP3-independent  
251 (2), was comparable between cell lines (Fig. 4H). Likewise, IL-1 $\beta$  release upon stimulation with the  
252 NLRP3- and BTK-independent (2) AIM2 inflammasome stimulus, poly(dA:dT), was comparable  
253 between WT and mutant cells (Fig. 4G,H). The data show that the BTK-modified tyrosine positions  
254 identified here play an important role for full NLRP3 inflammasome activity and subsequent IL-1 $\beta$   
255 release.

256 **Discussion**

257 The mechanism of activation of the NLRP3 inflammasome has been intensely studied for some time  
258 and recent work has unraveled a critical role of the dynamic localization of NLRP3 at the Golgi in the  
259 regulation of its activity (6) (7). Using both biochemical and cellular assays in human and murine  
260 primary cells, we found that BTK directly participated in these processes at the level of NLRP3,  
261 providing novel molecular insights: direct phosphorylation of four conserved and functionally  
262 important tyrosine residues in the NLRP3 polybasic linker motif affected linker charge and phospho-  
263 mimetic mutation weakened NLRP3-PI4P interactions, presumably by neutralization of the linker net  
264 surface charge. In line with this, in the presence of BTK NLRP3 retention to the Golgi is seemingly  
265 less, NLRP3 inflammasome oligomerization, ASC association, and increased IL-1 $\beta$  secretion higher.  
266 Our data suggest that BTK-mediated phosphorylation of multiple NLRP3 tyrosines may serve as a  
267 molecular switch tuning NLRP3 charge and subsequently localization and inflammasome assembly.  
268 Modification, localization, and oligomerization of NLRP3 have been recognized to be important but,  
269 supposedly hierarchically separate layers of NLRP3 inflammasome regulation and, as consequence, of  
270 inflammation. Our data indicate that some of these layers may be integrated and interconnected by  
271 BTK: By decoding the most basal determinants such as protein sequence, BTK appears to integrate  
272 post-translational modification, surface charge, interaction with organelles, and ultimately assembly  
273 of a highly oligomeric molecular machinery (Fig. S6). Such a dense and interconnected network of  
274 regulation would be in line with the critical needs to tightly control excessive IL-1 $\beta$  release to prevent  
275 pathologies. Of course, other proteins also participate in this process and we cannot formally rule out  
276 effects of BTK at the level of ASC. Nevertheless, our data indicate that BTK is directly involved in  
277 licensing full IL-1 $\beta$  levels via the regulatory events characterized here. Furthermore, NLRP3  
278 phosphorylation may represent a biomarker, and possibly therapeutic target, for early NLRP3  
279 activation. Collectively, our work provides both a rationale as well as concrete targeting strategies  
280 that may be applied to block excess IL-1 $\beta$  production in acute inflammasome-related diseases.

## 281 **Abbreviations**

282 AIM2 – Interferon-inducible protein absent in melanoma 2; ASC – Apoptosis-associated speck-like  
283 protein containing a Caspase activation and recruitment domain (CARD); BMDM – bone marrow-  
284 derived macrophages; BTK – Bruton’s Tyrosine Kinase; FDA – Food and Drug Administration; CAPS –  
285 Cryopyrin-associated periodic syndrome; GM-CSF - Granulocyte-macrophage colony-stimulating  
286 factor; HD – healthy (blood) donor; HEK – human embryonic kidney; IFN – Interferon; IL – Interleukin;  
287 KD – kinase-dead; LPS – Lipopolysaccharide; LRR – leucine-rich repeat; NEK7 – NIMA related kinase 7;  
288 NACHT – NAIP, CIITA, HET-E and TEP1; NLR – Nod-like receptor; NLRP3 – NACHT, LRR and PYD  
289 domains-containing protein 3; PBMC - peripheral blood mononuclear cell; PH – Pleckstrin homology;  
290 PI4P – phosphatidylinositol-4-phosphate; PMA - Phorbol-12-myristate-13-acetate; p-Y – phospho-  
291 tyrosine; PYD – Pyrin domain; SH - Src homology; TGN – trans-Golgi network; TH - Tec homology; TLR  
292 – Toll-like receptor; TNF – Tumor necrosis factor; XLA - X-linked agammaglobulinemia.

## 293 **Materials and Methods**

294 **Reagents.** Nigericin and Lipopolysaccharide (LPS) were purchased from Invivogen, ATP from Sigma,  
295 ibrutinib and acalabrutinib from Selleckchem, recombinant Granulocyte-macrophage colony-  
296 stimulating factor (GM-CSF) from Prepro-Tech, Ficoll from Merck Millipore. Peptides (EMC  
297 Microcollections Tübingen or synthesized in house) and antibodies are listed in Tables S1 and S2,  
298 respectively.

299 **Peptides.** Synthetic peptides were produced by standard 9-fluorenylmethyloxycarbonyl/tert-butyl  
300 strategy using peptide synthesizers P11 (Activotec, Cambridge, UK) or Liberty Blue (CEM, Kamp-  
301 Lintfort, Germany). Purity was assessed by reversed phase HPLC (e2695, Waters, Eschborn, Germany)  
302 and identity affirmed by nano-UHPLC (UltiMate 3000 RSLCnano) coupled online to a hybrid mass  
303 spectrometer (LTQ Orbitrap XL, both Thermo Fisher, Waltham, MA, USA). Lyophilized peptides were  
304 purified by standard HPLC. For certain peptides a pH titration with NaOH was performed using  
305 standard procedures. For *in vitro* assays peptides were dissolved at 10 mg/ml in dimethyl sulfoxide

306 (DMSO) and diluted 1:10 in bidistilled H<sub>2</sub>O. Frozen aliquots were further diluted in cell culture  
307 medium and sterile filtered if necessary.

308 **Plasmid constructs.** ASC, NLRP3 and BTK coding sequences in pENTR clones were generated as  
309 described in (18). Truncated Flag-tagged NLRP3 constructs were a kind gift of F. Martinon, Lausanne,  
310 Switzerland (15). Constructs for the human PYD-NACHT linker (residues 94-219) fused to mCitrine-HA  
311 or the murine polybasic motif (residues 127-146) in the context of Flag-GFP (as in (6)) were  
312 synthesized by GeneWiz. Point mutations in BTK and NLRP3 were subsequently introduced using  
313 QuikChange II Site-Directed Mutagenesis Kit from Agilent Technologies, following the manufacturer's  
314 instructions. Presence of the desired mutation and absence of unwanted regions in the entire CDS  
315 was confirmed by automated DNA sequencing.

316 **Study subjects and blood sample acquisition.** CAPS patients were recruited at the Department of  
317 Pediatrics, University Hospital Tübingen and XLA patients at the Centre of Chronic Immunodeficiency,  
318 University Hospital Freiburg, healthy blood donors at the Interfaculty Institute of Cell Biology,  
319 Department of Immunology, University of Tübingen. All patients and healthy blood donors included  
320 in this study provided their written informed consent before study participation. Approval for use of  
321 their biomaterials was obtained by the respective local ethics committees, in accordance with the  
322 principles laid down in the Declaration of Helsinki as well as applicable laws and regulations. XLA  
323 patients were clinically identified and genetically characterized as described in (2).

324 **Mice.** *Btk* KO (19) and *NLRP3* KO (Jackson stock No: 021302) and wild type C57BL/6J (Jackson)  
325 colonies were maintained in specific-pathogen free conditions under regular hygiene monitoring. All  
326 animal experiments were approved by local authorities and performed in accordance with local  
327 institutional guidelines and animal protection laws, including specific locally approved protocols for  
328 sacrificing.

329 **Cell culture.** All cells were cultured at 37 °C and 5% CO<sub>2</sub> in DMEM or RPMI supplemented with 10%  
330 fetal calf serum, L-glutamine (2 mM), penicillin (100 U/ml), streptomycin (100 µg/ml) (all from

331 Thermo Fisher). They were free of mycoplasma contamination and monitored regularly using a PCR-  
332 based assay.

333 **Isolation and stimulation of primary human immune cells.** Peripheral blood mononuclear cells  
334 (PBMCs) from healthy donors and patients were isolated from whole blood using Ficoll density  
335 gradient purification, primed with 10 ng/ml LPS for 3 h, and in some cases treated with 60  $\mu$ M  
336 ibrutinib before stimulation with 15  $\mu$ M nigericin for the indicated periods of time.

337 **Isolation of primary bone marrow-derived macrophages (BMDMs).** Bone marrow (BM) cells were  
338 isolated from femurs and tibiae of 8-12 week old mice, grown and differentiated using GM-CSF (M1  
339 polarization) as described (2).

340 **Expression and purification of recombinant BTK, NEK7 and NLRP3.** The plasmids encoding NLRP3  
341 with the deleted pyrin domain (amino acids 134–1034) for MBP-fusion protein expression in Bac-to-  
342 Bac system (Thermo Fisher) and human NEK7 for His-SUMO fusion protein expression in *E. coli* BL21  
343 (DE3) were described recently (8). For NLRP3 expression the baculovirus of NLRP3 was prepared  
344 using the Bac-to-Bac system (Thermo Fisher). Protein expression was induced by infection of Sf9 cells  
345 with 1% v/v of baculovirus. 48 h after infection cells were lysed by sonication in buffer containing 30  
346 mM HEPES, 200 mM NaCl, 2 mM 2-mercaptoethanol and 10% glycerol at pH 7.5 with freshly added  
347 protease inhibitor cocktail (Sigma). The supernatant was incubated with 3 ml amylose resin at 4°C for  
348 1 h and subjected to gravity flow. NLRP3 protein was eluted with 50 mM maltose and further purified  
349 with size-exclusion chromatography on Superose 6 10/300 GL column (GE Healthcare) equilibrated  
350 with buffer containing 30 mM HEPES, 150 mM NaCl and 2 mM  $\beta$ -mercaptoethanol at pH 7.5. NEK7  
351 was overexpressed in *E. coli* BL21 (DE3) overnight at 18 °C after induction with 0.1 mM isopropyl- $\beta$ -d-  
352 thio-galacto-pyranoside after optical density at 600 nm reached 0.8. Cells were lysed by sonication in  
353 buffer containing 50 mM HEPES, 500 mM NaCl, 5 mM MgCl<sub>2</sub>, 10 mM imidazole, 10% glycerol and 2  
354 mM  $\beta$ -mercaptoethanol at pH 7.5 with freshly added protease inhibitor cocktail (Sigma). The His-  
355 SUMO-fusion NEK7 was purified by affinity chromatography using Ni-NTA beads (Qiagen) followed by  
356 size-exclusion chromatography on Superdex 200 10/300 GL column (GE Healthcare) equilibrated with

357 buffer containing 30 mM HEPES, 150 mM NaCl and 2 mM  $\beta$ -mercaptoethanol at pH 7.5. WT and  
358 kinase-dead mutant BTK were overexpressed in Expi293 cells (Thermo Fisher) using transient  
359 transfection with poly-ethylenimine 25K (Polysciences). Cells were harvested 96 h post transfection  
360 and lysed in buffer containing 50 mM HEPES, 150 mM NaCl, 2 mM 2-mercaptoethanol and 10%  
361 glycerol at pH 7.5 with freshly added protease inhibitor cocktail (Sigma). The FLAG-fusion proteins  
362 were subjected to affinity chromatography using anti-FLAG M2 affinity gel (Millipore Sigma), eluted  
363 with 3xFLAG-peptide (Millipore Sigma) and further purified by size-exclusion chromatography on  
364 Superdex 200 10/300 GL column (GE Healthcare) equilibrated with buffer containing 30 mM HEPES,  
365 150 mM NaCl and 2 mM  $\beta$ -mercaptoethanol at pH 7.5. Proteins were concentrated to 2-7mg/ml,  
366 flash-frozen in liquid nitrogen and stored at -80 °C.

367 **In vitro pull-downs.** MBP-tagged NLRP3 (2  $\mu$ M) was mixed with 4  $\mu$ M His-SUMO-NEK7 or wild type or  
368 mutant FLAG-BTK in buffer containing 30 mM HEPES, 150 mM NaCl and 2 mM  $\beta$ -mercaptoethanol at  
369 pH 7.5, and incubated for 30 min at 30°C. The mixture was further incubated for 1 h with 40  $\mu$ l  
370 amylose resin and washed twice with 500  $\mu$ l of the same buffer, followed by 1 h elution with 50 mM  
371 maltose. 30% and 70% of the sample was loaded as input and elution fractions, respectively, and  
372 analyzed by SDS-PAGE and immunoblot using monoclonal Anti-Flag<sup>®</sup> M2-Peroxidase (HRP) or anti-p-  
373 Y antibody (Sigma-Aldrich).

374 **ELISA.** Human and murine IL-1 $\beta$ , IL-6 or TNF in supernatants were determined by ELISA using half-  
375 area plates using kits by R&D Systems and Biolegend, determining triplicate points on a standard  
376 plate reader.

377 **Co-immunoprecipitation and immunoblot.** PBMCs or BMDMs were primed with LPS and stimulated  
378 with nigericin, washed with cold PBS and immediately lysed in RIPA lysis buffer containing  
379 protease/phosphatase inhibitors (Roche). A sample of the cleared lysate was taken before addition of  
380 the primary antibody (see Table S2). After 18 hours of rotation in the cold room, magnetic bead  
381 coupled secondary antibody (Protein G Dynabeads, Thermo Fisher) was added for another 90 min.  
382 The beads were then washed three times with lysis buffer, resuspended in SDS loading buffer and



383 boiled. HEK293T were transfected using CaPO<sub>4</sub> and lysed 48 hours later in RIPA buffer with  
384 protease/phosphatase inhibitors (Roche). Cleared lysates were subjected to immunoprecipitation of  
385 the NLRP3-HA or NACHT-FLAG fusion protein with Dynabeads (Sigma-Aldrich), or with agarose beads  
386 covered with PI4P (P-B004a, Echelon Biosciences). Washed beads were boiled in loading buffer and  
387 applied to standard SDS-PAGE on Thermo Fisher pre-cast gels, followed by immunoblot according to  
388 the antibody manufacturer's instructions. Membranes were exposed using Peqlab Fusion FL camera  
389 and FusionCapt Advance software. Quantification was conducted using the same software.

390 **WES capillary electrophoresis.** 3 µl of the prepared Western Blot lysates were run on ProteinSimple  
391 WES instrument according to the manufacturer's instructions. Data were analyzed with the Compass  
392 for SW software comparing the p-NLRP3 signal with the heavy chain signal from the same run as an  
393 internal control.

394 **Native PAGE.** BMDMs were stimulated and lysed in RIPA lysis buffer without SDS: Lysates were  
395 centrifuged at 2,300 x *g* for 10 min to pellet DNA. Supernatant was centrifuged at 16,100 x *g* for 25  
396 min and the pellet was resuspended in Native PAGE sample buffer (Thermo Fisher). The samples  
397 were loaded onto NuPage 3-8% Tris-Acetate gels (Thermo Fisher) without boiling and native PAGE  
398 was conducted using Tris-Glycine running buffer (Thermo Fisher). The gel was soaked in 10% SDS  
399 solution for 10 min before performing semi-dry transfer and continuing with conventional  
400 immunoblot.

401 **Crosslinking of ASC oligomers.** BMDMs were primed with LPS and treated with ibrutinib and  
402 nigericin. Cells were lysed in RIPA lysis buffer and pellets were cross-linked using DSS and analyzed as  
403 described in (20).

404 **Size exclusion chromatography.** BMDMs were stimulated and lysed in 50 mM Tris-HCl pH 7.4, 1%  
405 NP-40, and 150 mM NaCl. 100 µl cleared lysate were loaded on a Superdex 200 Increase 10/300 GL  
406 (GE Healthcare) column and proteins were eluted using ÄKTA Purifier (GE Healthcare) and buffer 50

407 mM Tris-HCL pH 7.4 and 150 mM NaCl with 0.25 ml/min flow. 200  $\mu$ l fractions were collected and  
408 analyzed via Western-Blot.

409 **In vitro kinase assay.** For results in Fig. 1H, recombinant NLRP3 from Novus Biologicals (H00114548-  
410 P01) and BTK from Sino Biological (10578-H08B) or Abcam (ab205800) were incubated at 30 °C for 3  
411 hours using CST kinase buffer (#9802) in the presence of 2 mM ATP. As a negative control,  
412 recombinant Posi-Tag Epitope Tag Protein (Biolegend) was used. Before and after kinase assay  
413 samples were boiled and analyzed via SDS PAGE and Western Blot. For results in Fig. S1B, NLRP3 and  
414 BTK (WT or KD) were purified as described above. For reaction 2  $\mu$ M MBP-tagged NLRP3 was mixed  
415 with or without 0.2  $\mu$ M purified FLAG-tagged BTK in buffer containing 30 mM HEPES, 150 mM NaCl,  
416 12.5 mM MgCl<sub>2</sub>, 2.5 mM ATP and 2 mM  $\beta$ -mercaptoethanol at pH 7.5 in presence or absence of  
417 ibrutinib (Selleckchem, cat. S2680). The mixture was incubated at 30°C and equal aliquots were taken  
418 at indicated time points. Samples were analyzed by SDS-PAGE and immunoblot using anti-p-Y  
419 antibody (Cell signaling, cat. 8954S).

420 **Dot blot analysis.** Synthetized peptides were incubated with recombinant BTK (Sino Biologicals) for 3  
421 h in CST kinase buffer (#9802) supplemented with 2 mM ATP. Next, the samples were boiled and  
422 anti-His magnetic beads (Dynabeads™ His-Tag Isolation and Pulldown, Thermo Fisher) were added to  
423 deplete the samples of phosphorylated BTK. The samples were cleared from the magnetic beads and  
424 the supernatants were manually spotted on a nitrocellulose membrane. The dried spots were stained  
425 using the Pierce reversible protein stain to visualize total peptide amounts. Then the membrane was  
426 blocked with 5% BSA in TBS-T and conventional anti-phospho-Tyrosine primary and secondary  
427 antibody incubation steps followed.

428 **Subcellular fractionation.** Cells were homogenized using a 10 ml syringe and 27 G x 19 mm needles  
429 in homogenization buffer (0.25 M sucrose, 10 mM Tris HCl (pH 7.5), 10 mM KCl, 1.5 mM MgCl<sub>2</sub>,  
430 protease inhibitor (Roche) and PhosStop (Roche)). Homogenized cells were centrifuged at 1,000 x *g*  
431 for 5 min to remove the nucleus. The supernatant was centrifuged at 5,000 x *g* for 10 min to obtain a

432 heavy membrane fraction (pellet, P5). The supernatant was centrifuged 100,000 x *g* for 20 min to  
433 separate a light membrane fraction (S100) from the cytosol. P5 and S100 were washed once with  
434 homogenization buffer and then used for sucrose gradient ultracentrifugation, separately. For  
435 sucrose gradient ultracentrifugation, a continuous 15-45% (w/w) sucrose gradient was prepared in  
436 10 mM Tris-HCl (pH 7.5), 20 mM KCl, and 3 mM MgCl<sub>2</sub>) using a Biocomp Gradient Station (Biocomp  
437 Instruments, Fredrickton, NB, Canada). P5 or S100 was loaded on top of the gradient and centrifuged  
438 at 170,000 x *g* for 3 h. The gradient was fractionated into 12 fractions of 1.1 ml using the fraction  
439 collector module of a Biocomp Gradient Station.

440 **PI4P bead binding assays.** HEK293T cells were transfected with HA-tagged human WT or Y>E  
441 PYD/NACHT linker (residues 94-219)-mCitrine-HA constructs. Cells were lysed in RIPA buffer and PI4P  
442 (Echelon Biosciences, P-B004A) or the same amount of control beads (Echelon Biosciences, P-B000)  
443 were added to cleared lysates and incubated for 1.5 h on 4 °C while rotating. Beads were then  
444 washed 3 times with RIPA buffer, boiled and bound proteins were analyzed via immunoblot.  
445 Alternatively, cells were transfected with WT, Y>E or K>A Flag-tagged murine polybasic region  
446 (residues 127-146)-GFP-Flag constructs, adopted from (6). PI4P beads or control beads were blocked  
447 beforehand in 2% BSA, 0.5% NP-40 and 200 µg/ml Flag peptide (Sigma-Aldrich, F3290) for 2 h at 4°C.  
448 Transfected cells were then lysed in RIPA buffer and the expressed proteins were purified using Anti-  
449 FLAG® M2 Magnetic Beads (M8823, Merck). Beads were washed 3x with RIPA buffer and boiled to  
450 elute the purified polybasic region. Blocked PI4P beads or the same amount of control beads were  
451 added to the eluted protein, and incubated for 1.5 h on 4°C while rotating. Beads were then washed  
452 3x8 min with RIPA buffer, resuspended in LDS sample buffer, boiled, and bound protein was analyzed  
453 using immunoblot.

454 **Reconstitution and analysis of NLRP3-deficient immortalized macrophages.** NLRP3-deficient  
455 immortalized macrophages (21) were retrovirally transduced with NLRP3 (WT or 4xY>F)-Flag-T2A-  
456 mCherry constructs as described in (21) and subsequently sorted for similar expression of mCherry.  
457 Similar NLRP3 expression was confirmed by anti-Flag immunoblot of cell lysates. Cells were seeded at

458  $1 \times 10^5$  cells/well in a 96 well plate in 100ul, primed with LPS (200 ng/ml) for 3h and inflammasome  
459 stimuli in optiMEM added as follows: nigericin at 8  $\mu$ M for 1.5 h, R837 (imiquimod) at 20  $\mu$ g/ml for 2  
460 h or poly(dA:dT) at 200 ng per well with 0.5  $\mu$ l lipofectamine 2000 for 4 h. IL-1 $\beta$  and TNF were  
461 subsequently determined by IL-1 $\beta$  and TNF HTRF assay respectively (Cisbio; 62MIL1BPEH and  
462 62MTNFAPEG).

463 **NLRP3 sequence analysis, structure inspection and charge prediction.** NLR sequences were  
464 retrieved from UniProt and ClustalW aligned within Geneious R6 software. A hypothetical active  
465 conformation of NLRP3 was modeled based on NLRP3-NEK7 structure in an inactive state (PDB 6NPY)  
466 (8). NACHT domain reorganization and hypothetical NLRP3 oligomerization was generated, based on  
467 the NLRC4 oligomer (PDB 3JBL) as a homology model template by introduction of a 90° rotation of  
468 NBD-HD1 module (8). Phosphorylation of tyrosine residues of interest was performed in Pymol  
469 (Schrödinger) using the PyTMs plugin (22). Electrostatic potential of the solvent accessible surface of  
470 phosphorylated and non-phosphorylated NLRP3 models was calculated with PBEQ-Solver online  
471 visualization tool (<http://www.charmm-gui.org> (23-25) and visualized with Pymol. Protein net  
472 charges of the Y136, Y140 and Y143-containing linker were conducted with ProtPi ([www.protpi.ch](http://www.protpi.ch)).

473 **Statistics.** Experimental data was analyzed using Excel 2010 (Microsoft) and/or GraphPad Prism 6, 7  
474 or 8, microscopy data with ImageJ/Fiji, flow cytometry data with FlowJo 10. Normal distribution in  
475 each group was always tested using the Shapiro-Wilk test first for the subsequent choice of a  
476 parametric (ANOVA, Student's *t*-test) or non-parametric (e.g. Friedman, Mann-Whitney U or  
477 Wilcoxon) test. *p*-values ( $\alpha=0.05$ ) were then calculated and multiple testing was corrected for in  
478 Prism, as indicated in the figure legends. Values  $<0.05$  were generally considered as statistically  
479 significant and denoted by \* throughout. Comparisons were made to unstimulated control, unless  
480 indicated otherwise, denoted by brackets.

481 **Figure Captions**

482 **Figure 1: NLRP3 directly interacts and is tyrosine phosphorylated by BTK.** (A, B) IL-1 $\beta$  release  
483 (triplicate ELISA) from WT vs *Btk* KO BMDM (A, n=5 each) or XLA vs healthy donor (HD) PBMCs (B,  
484 n=3-6). (C, D) Co-IP of NLRP3 from WT, *Btk* KO or *Nlrp3* KO BMDM (n=3) or ibrutinib-treated PBMC  
485 lysates (n=2). (E) *In vitro* pulldown of FLAG-tagged BTK or His-SUMO-tagged NEK7 by MBP-tagged  
486 NLRP3 (n=3). (F, G) as in C and D, respectively, but with anti-phospho-tyrosine (p-Y) IP (n=3 or 5,  
487 respectively). (H) as in E but using two different commercial suppliers, A and B, of recombinant BTK.  
488 PosiTag = specificity control. (I) as in G but with ibrutinib pre-treatment (n=2). (J, K) IPs from HEK293T  
489 cells transfected with NLRP3 and BTK WT or kinase dead (KD) constructs, or treated with inhibitors  
490 (n=2 each). A and B represent combined data (mean+SD) from 'n' biological replicates (each dot  
491 represents one mouse or patient/HD). C-K are representative of 'n' biological (HD or mouse) or  
492 technical replicates. \* p<0.05 using Student's *t*-test (A) or one-way ANOVA with Dunnett's correction  
493 (B).

494 **Figure 2: BTK phosphorylates the PYD-NACHT linker.** (A) NLRP3 domains (UniProt ID Q96P20). (B) IP  
495 from HEK293T cells transfected with NLRP3 and BTK constructs (n=3). (C) as in B but including  
496 ibrutinib (n=3). (D) Positions of targeted tyrosine residues. (E) Linker region including polybasic motif.  
497 (F) as in B but using Y to F point mutants and WT or kinase-dead (KD) BTK plasmids (n=4). (G)  
498 Quantification of F. (H) WES capillary electrophoresis of IP p-NLRP3 (n=3). (I) Dot blot of BTK kinase  
499 assay with 15-mer synthetic peptides (n=3). (J) as in F but also NLRP3 linker (WT or Y-mutated) fused  
500 to mCitrine-HA (n=3). (K) Tyrosines (red) highlighted in model of NLRP3 (blue)-NEK7 (yellow) complex  
501 (pdb: 6NPY). Close up view on dimer interface (L) and putative nucleotide binding site (M). G  
502 represents combined data (mean+SD) from 'n' biological replicates (each dot represents one  
503 replicate). B, C, F, H-J are representative of 'n' technical replicates. \* p<0.05 according to one sample  
504 *t*-test (G).

505 **Figure 3: BTK phosphorylation of the NLRP3 polybasic motif enables Golgi/PI4P dissociation.** (A, B)  
506 Charge distribution (A) and ProtPi net charge computation (B) of unmodified and 3x phospho-peptide

507 polybasic human NLRP3 linker. (C) pH titration of peptides encompassing the polybasic motifs of  
508 human or murine NLRP3 as phospho- (blue) or non-phosphorylated control (red) peptide (n=3). (D)  
509 NLRP3 linker-Cit-HA constructs precipitated with PI4P beads (n=3). (E) as in D but murine NLRP3  
510 polybasic region fused to GFP-HA (mPBR-GFP-HA, n=3). (F) Subcellular fractionation of nigericin-  
511 treated WT or *Btk* KO BMDM lysates (n=3). C represents combined data (mean+SD) from 'n'  
512 biological replicates. In D-E one representative example of 'n' technical replicates is shown. \* p<0.05  
513 according to two-way ANOVA (C).

514

515 **Figure 4: BTK modification affects NLRP3 oligomerization and IL-1 $\beta$  release.** (A-C) WT, *Btk* KO, *Nlrp3*  
516 KO or *Pycard* (ASC) KO BMDM stimulated and respective lysates analyzed directly by native PAGE (A,  
517 n=2 and B, n=4) or ASC cross-linked in the pellet (C, n=4) and/or analyzed by SDS-PAGE. (D) as in A  
518 but size exclusion chromatography (SEC) fractions (n=3). (E) as in D comparing inhibitor treated WT  
519 BMDM or *Btk* KO BMDM lysates (n=3). (F-H) NLRP3 expression levels (F), IL-1 $\beta$  (G) or TNF (H) release  
520 from WT or 4xY>F NLRP3-reconstituted NLRP3-deficient iMacs (n=3). G-H represent combined data  
521 (mean+SD) from 'n' technical replicates. A-F are representative of 'n' biological (mice) or technical  
522 replicates. \* p<0.05 according to one-way ANOVA (H) or ANOVA with Sidak correction (G).

### 523 **Author contributions**

524 ZAB, XL, SD, HK, KB, LA, AM, MM, PD, ML, FH, SS, ATA, OOW, NAS, SW and ANRW performed  
525 experiments; ZAB, XL, SD, HK, LA, SS, ML, MM, PD, FH, NAS, SW and ANRW analyzed data; MWL, JKD,  
526 AD and BG were involved in patient recruitment and sample acquisition; ZAB and ANRW wrote the  
527 manuscript and LA, PD, MWL, SS, ATA, SW, HW and EL provided valuable comments. All authors  
528 approved the final manuscript. ANRW and ZAB conceived and coordinated the study. *S.D.G.*

### 529 **Acknowledgements**

530 We gratefully acknowledge Ulrich Wulle for help with peptide synthesis and Yamel Cardona Gloria  
531 for helpful comments. We thank Xiaowu Zhang and Felix Meissner for helpful advice on kinase target

532 residue identification and mass spectrometry, respectively. We thank all study subjects and their  
533 families for participating in the study.

534 **References**

- 535 1. M. S. J. Mangan *et al.*, *Nat Rev Drug Discov* **17**, 588 (Aug, 2018).  
536 2. X. Liu *et al.*, *J Allergy Clin Immunol*, (Feb 16, 2017).  
537 3. Y. He, M. Y. Zeng, D. Yang, B. Motro, G. Nunez, *Nature* **530**, 354 (Feb 18, 2016).  
538 4. B. F. Py, M. S. Kim, H. Vakifahmetoglu-Norberg, J. Yuan, *Mol Cell* **49**, 331 (Jan 24, 2013).  
539 5. N. Song, T. Li, *Front Immunol* **9**, 2305 (2018).  
540 6. J. Chen, Z. J. Chen, *Nature* **564**, 71 (Dec, 2018).  
541 7. Z. Zhang *et al.*, *J Exp Med* **214**, 2671 (Sep 4, 2017).  
542 8. H. Sharif *et al.*, *Nature* **570**, 338 (Jun, 2019).  
543 9. A. N. R. Weber *et al.*, *Front Immunol* **8**, 1454 (2017).  
544 10. P. Duewell *et al.*, *Nature* **464**, 1357 (Apr 29, 2010).  
545 11. L. Broderick, D. De Nardo, B. S. Franklin, H. M. Hoffman, E. Latz, *Annu Rev Pathol* **10**, 395  
546 (2015).  
547 12. J. L. Schmid-Burgk *et al.*, *J Biol Chem* **291**, 103 (Jan 1, 2016).  
548 13. M. Ito *et al.*, *Nat Commun* **6**, 7360 (2015).  
549 14. A. Tapia-Abellan *et al.*, *Nat Chem Biol* **15**, 560 (Jun, 2019).  
550 15. A. Mayor, F. Martinon, T. De Smedt, V. Petrilli, J. Tschopp, *Nat Immunol* **8**, 497 (May, 2007).  
551 16. A. Stutz, G. L. Horvath, B. G. Monks, E. Latz, *Methods Mol Biol* **1040**, 91 (2013).  
552 17. Z. Li *et al.*, *Proc Natl Acad Sci U S A* **94**, 13820 (Dec 9, 1997).  
553 18. H. Wang *et al.*, *Hepatology* **62**, 1375 (2015).  
554 19. W. N. Khan *et al.*, *Immunity* **3**, 283 (Sep, 1995).  
555 20. S. Khare, A. D. Radian, A. Dorfleutner, C. Stehlik, *Methods Mol Biol* **1417**, 131 (2016).  
556 21. V. Hornung *et al.*, *Nat Immunol* **9**, 847 (Aug, 2008).  
557 22. A. Warnecke, T. Sandalova, A. Achour, R. A. Harris, *BMC Bioinformatics* **15**, 370 (Nov 28,  
558 2014).  
559 23. A. D. MacKerell, *Abstr Pap Am Chem S* **216**, U696 (Aug 23, 1998).  
560 24. S. Jo, T. Kim, V. G. Iyer, W. Im, *J Comput Chem* **29**, 1859 (Aug, 2008).  
561 25. S. Jo, M. Vargyas, J. Vasko-Szedlar, B. Roux, W. Im, *Nucleic Acids Res* **36**, W270 (Jul 1, 2008).

562

563



564 **Title and Authors**

565 **BTK operates a phospho-tyrosine switch to**  
566 **regulate NLRP3 inflammasome activity**

567 by Bittner *et al.*

568 **Supplemental figure legends**

569 **Figure S1:** (A) Co-IP of NLRP3 from healthy donor (HD) or XLA patient PBMC lysates (n=3). (B) p-  
570 NLRP3 occurrence in the *in vitro* kinase assay with BTK or kinase-dead BTK (KD) upon incubation with  
571 ATP for the indicated periods of time, with and without inclusion of ibrutinib. (C) HEK293T cells were  
572 transfected with the indicated NLRP3 and BTK WT or mutant constructs, treated with inhibitors and  
573 lysates subjected to HA-IP and immunoblot (n=3 each). In A-C one representative of 'n' biological  
574 replicates is shown.

575 **Figure S2:** Annotation of NLRP3 sequence (UniProt ID Q96P20).

576 **Figure S3:** (A) Position of all mutated Tyr residues in Linker-NACHT construct. (B) Phosphorylation  
577 analysis of core-NACHT tyrosine NLRP3 mutants. HEK293T cells were transfected with the indicated  
578 NLRP3 mutant constructs and a BTK WT construct as indicated and lysates subjected to HA-IP and  
579 immunoblot as indicated (n=4 each). (B) Quantification of A combined from n=4 experiments. (C)  
580 Quantification of WES capillary electrophoresis of NLRP3 p-Y IPs from HEK293T cells (Fig. 2H) from  
581 n=3 experiments. (D) Mass spectrometric analysis of purified mNLRP3, digested with different  
582 proteases, showing combined (upper) and separate coverage (lower) information (Ref. (16)). (E) Dot  
583 blot of *in vitro* kinase assay of His-BTK and 15-mer synthetic peptides derived from human NLRP3  
584 containing the indicated tyrosines stained with a total protein stain (upper; input) or anti-p-Y Abs  
585 (lower grid, n=3). (F) As in E but with peptides derived from murine NLRP3 (n=3). B, D represent  
586 combined data (mean+SD) from 'n' biological replicates. In E-F one representative of 'n' biological  
587 replicates is shown. \* p<0.05 according to one sample *t*-test (B, C).

588 **Figure S4:** Structural aspects and conservation of BTK-modified tyrosine residues in NLRP3. (A) NLRP3  
589 model 6NPY showing NLRP3 Linker-NACHT-LRR (blue) and NEK7 C-terminal lobe (yellow). A putative  
590 bound ADP molecule and selected tyrosines are highlighted. (B) ClustalW multiple sequence  
591 alignments of NLRP3 sequences from other species. Coloring according to similarity (black =  
592 conserved). BTK-modified tyrosines are highlighted (residue numbering according to human NLRP3).

593 **Figure S5:** (A) CHARMM surface charge predictions of Linker-NACHT-LRR structure in the non-  
594 phosphorylated (left) and 4x phosphorylated (right) form. Blue = positive, red = negative charge. Grey  
595 boxes indicate that the area of charge alterations in the monomers maps to a contact area in the  
596 hypothetical dimer (center, rotated by 90 °; see relative position in oligomer, below). (B) Sucrose  
597 gradient fractionation of WT and *Btk* KO BMDM lysates upon LPS + nigericin treatment for 5 min.  
598 Fractions were analyzed by SDS-PAGE and immunoblot as indicated (n=1; pilot fractionation  
599 experiment).

600 **Figure S6:** Graphical summary illustrating multiple roles of BTK as NLRP3 regulator.

601 **Table S1: Peptides used in this study.**

| Nr.                 | Contained tyrosine(s) | Sequence            | Modifications       | Use in Fig. | Manufacturer |
|---------------------|-----------------------|---------------------|---------------------|-------------|--------------|
| <b>Human NLRP3</b>  |                       |                     |                     |             |              |
| 1                   | Y84                   | AINRRDLYEKAKRDE     |                     | S3          | In house     |
| 2                   | Y123                  | EWMGLLEYLSRISIC     |                     | S3          | In house     |
| 3                   | Y136, Y140, Y143      | ICKMKKDYRKKYRKY     |                     | S3          | In house     |
| 4                   | Y136, Y140, Y143      | KKDYRKKYRKYVRSR     |                     | F2, F3      | In house     |
| 5                   | Y136, Y140, Y143      | YRKKYRKYVRSRFQC     |                     | S3          | In house     |
| 6                   | Y136                  | KKDYRKKFRKFVRSR     | Y140F, Y143F        | F2          | In house     |
| 7                   | Y140                  | ICKMKKDFRKKYRKF     | Y136F, Y143F        | F2          | In house     |
| 8                   | Y143                  | FRKKFRKYVRSRFQC     | Y136F, Y140F        | F2          | In house     |
| 9                   | Y168                  | SVSLNKRYTRLRLIK     |                     | F3, S3      | In house     |
| 10                  | Y249                  | DWASGTLYQDRFDYL     |                     | S3          | In house     |
| 11                  | Y255                  | LYQDRFDYLFYIHCR     |                     | S3          | In house     |
| 12                  | Y258                  | DRFDYLFYIHCREVS     |                     | S3          | In house     |
| 13                  | Y381                  | SEAKRKEYFFKYFSD     |                     | S3          | In house     |
| 14                  | Y385                  | RKEYFFKYFSDEAQA     |                     | S3          | In house     |
| 15                  | Y443                  | SKTTTAVYVFFLSSL     |                     | S3          | In house     |
| 16                  | Y518                  | EVDCEKFYSFIHMTF     |                     | S3          | In house     |
| 17                  | Y533, Y534            | QEFFAAMYLLSEEEK     |                     | S3          | In house     |
| 18                  | Y136, Y140, Y143      | KKDFRKKFRKFVRSR     | Y136F, Y140F, Y143F | F2          | In house     |
| 19                  | Y168                  | SVSLNKRFTRLRLIK     | Y168F               | F2          | In house     |
| 20                  | Y136, Y140, Y143      | KKDpYRKKpYRKKpYVRSR | Phospho-Y           | F3          | In house     |
| <b>Murine NLRP3</b> |                       |                     |                     |             |              |
| 21                  | Y132                  | ICKKKKDYCKMFRRH     | Y136F               | S3          | In house     |
| 22                  | Y136                  | KKDFCKMYRRHVRSR     | Y132F               | S3          | In house     |
| 23                  | Y144                  | RHVRSRFYSIKDRNA     |                     | S3          | In house     |
| 24                  | Y164                  | SVDLNSRYTQLQLVK     |                     | S3          | In house     |
| 25                  | Y132, Y136            | ICKKKKDYCKMYRRH     |                     | F3          | In house     |
| 26                  | Y132, Y136            | ICKKKKpYCKMpYRRH    | Phospho-Y           | F3          | In house     |

602

603 **Table S2: Antibodies used in this study.**

| Specificity                                | Manufacturer  | Cat. Nr.         |
|--------------------------------------------|---------------|------------------|
| mNLRP3                                     | Adipogen      | AG-20B-0014-C100 |
| hNLRP3                                     | CST           | #15101           |
| hBTK                                       | BD            | 611117           |
| mBTK                                       | CST           | #8547            |
| HA                                         | CST           | #3724            |
| Flag                                       | Sigma-Aldrich | F1804            |
| p-Y                                        | CST           | #8954            |
| ASC                                        | CST           | #67824           |
| hIL-1 $\beta$                              | R&D Systems   | MAB601           |
| mIL-1 $\beta$                              | CST           | #12242           |
| mCaspase-1                                 | CST           | #3866            |
| GAPDH                                      | Thermo-Fisher | # MA5-15738      |
| Citrate synthetase                         | GeneTex       | GTX110624        |
| Anti-Mouse IgG (H+L) HRP conjugate         | Promega       | W4021            |
| Anti-Rabbit IgG (H+L) HRP conjugate        | Vector        | PI-1000          |
| VeriBlot for IP Detection Reagent (HRP)    | Abcam         | Ab131366         |
| Anti-Flag <sup>®</sup> M2-Peroxidase (HRP) | Sigma-Aldrich | A8592            |

604

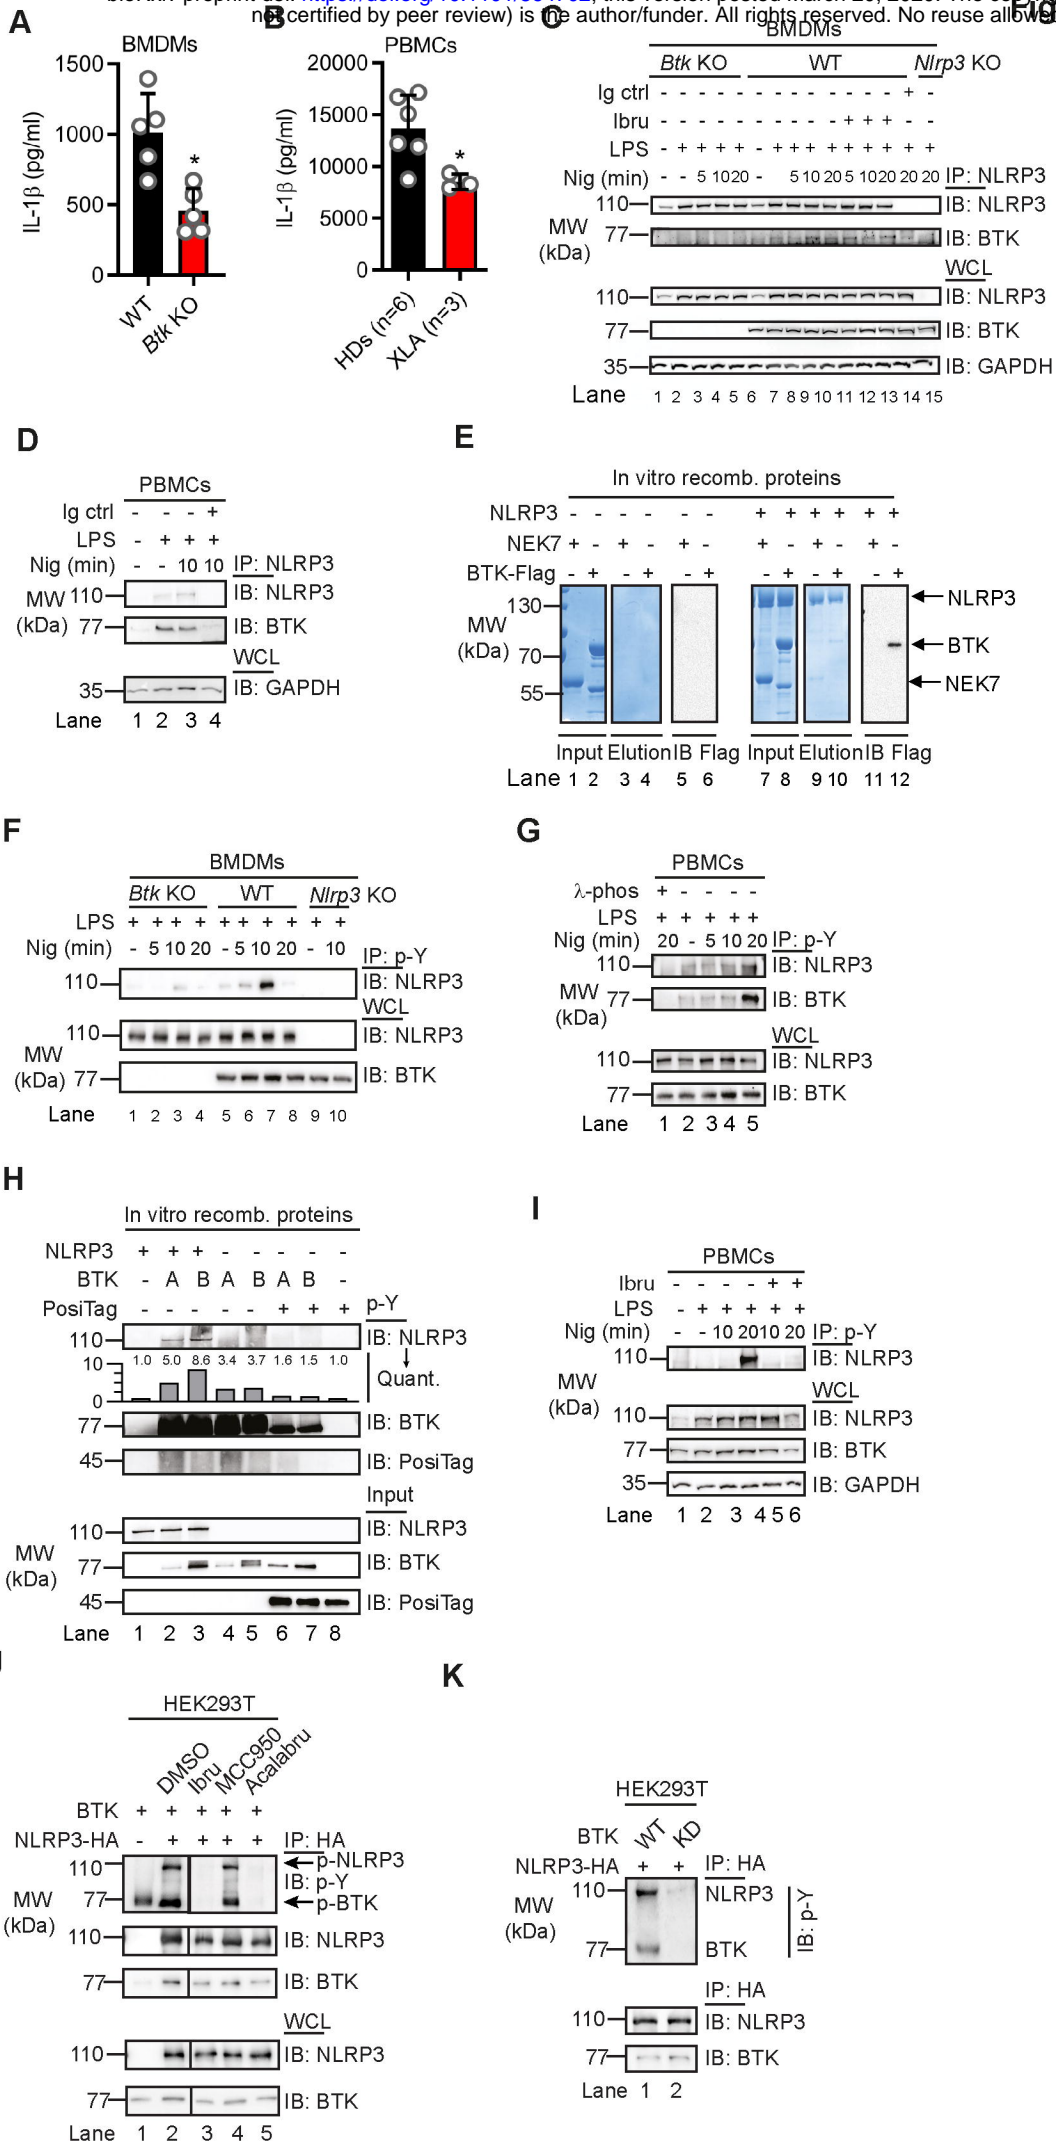

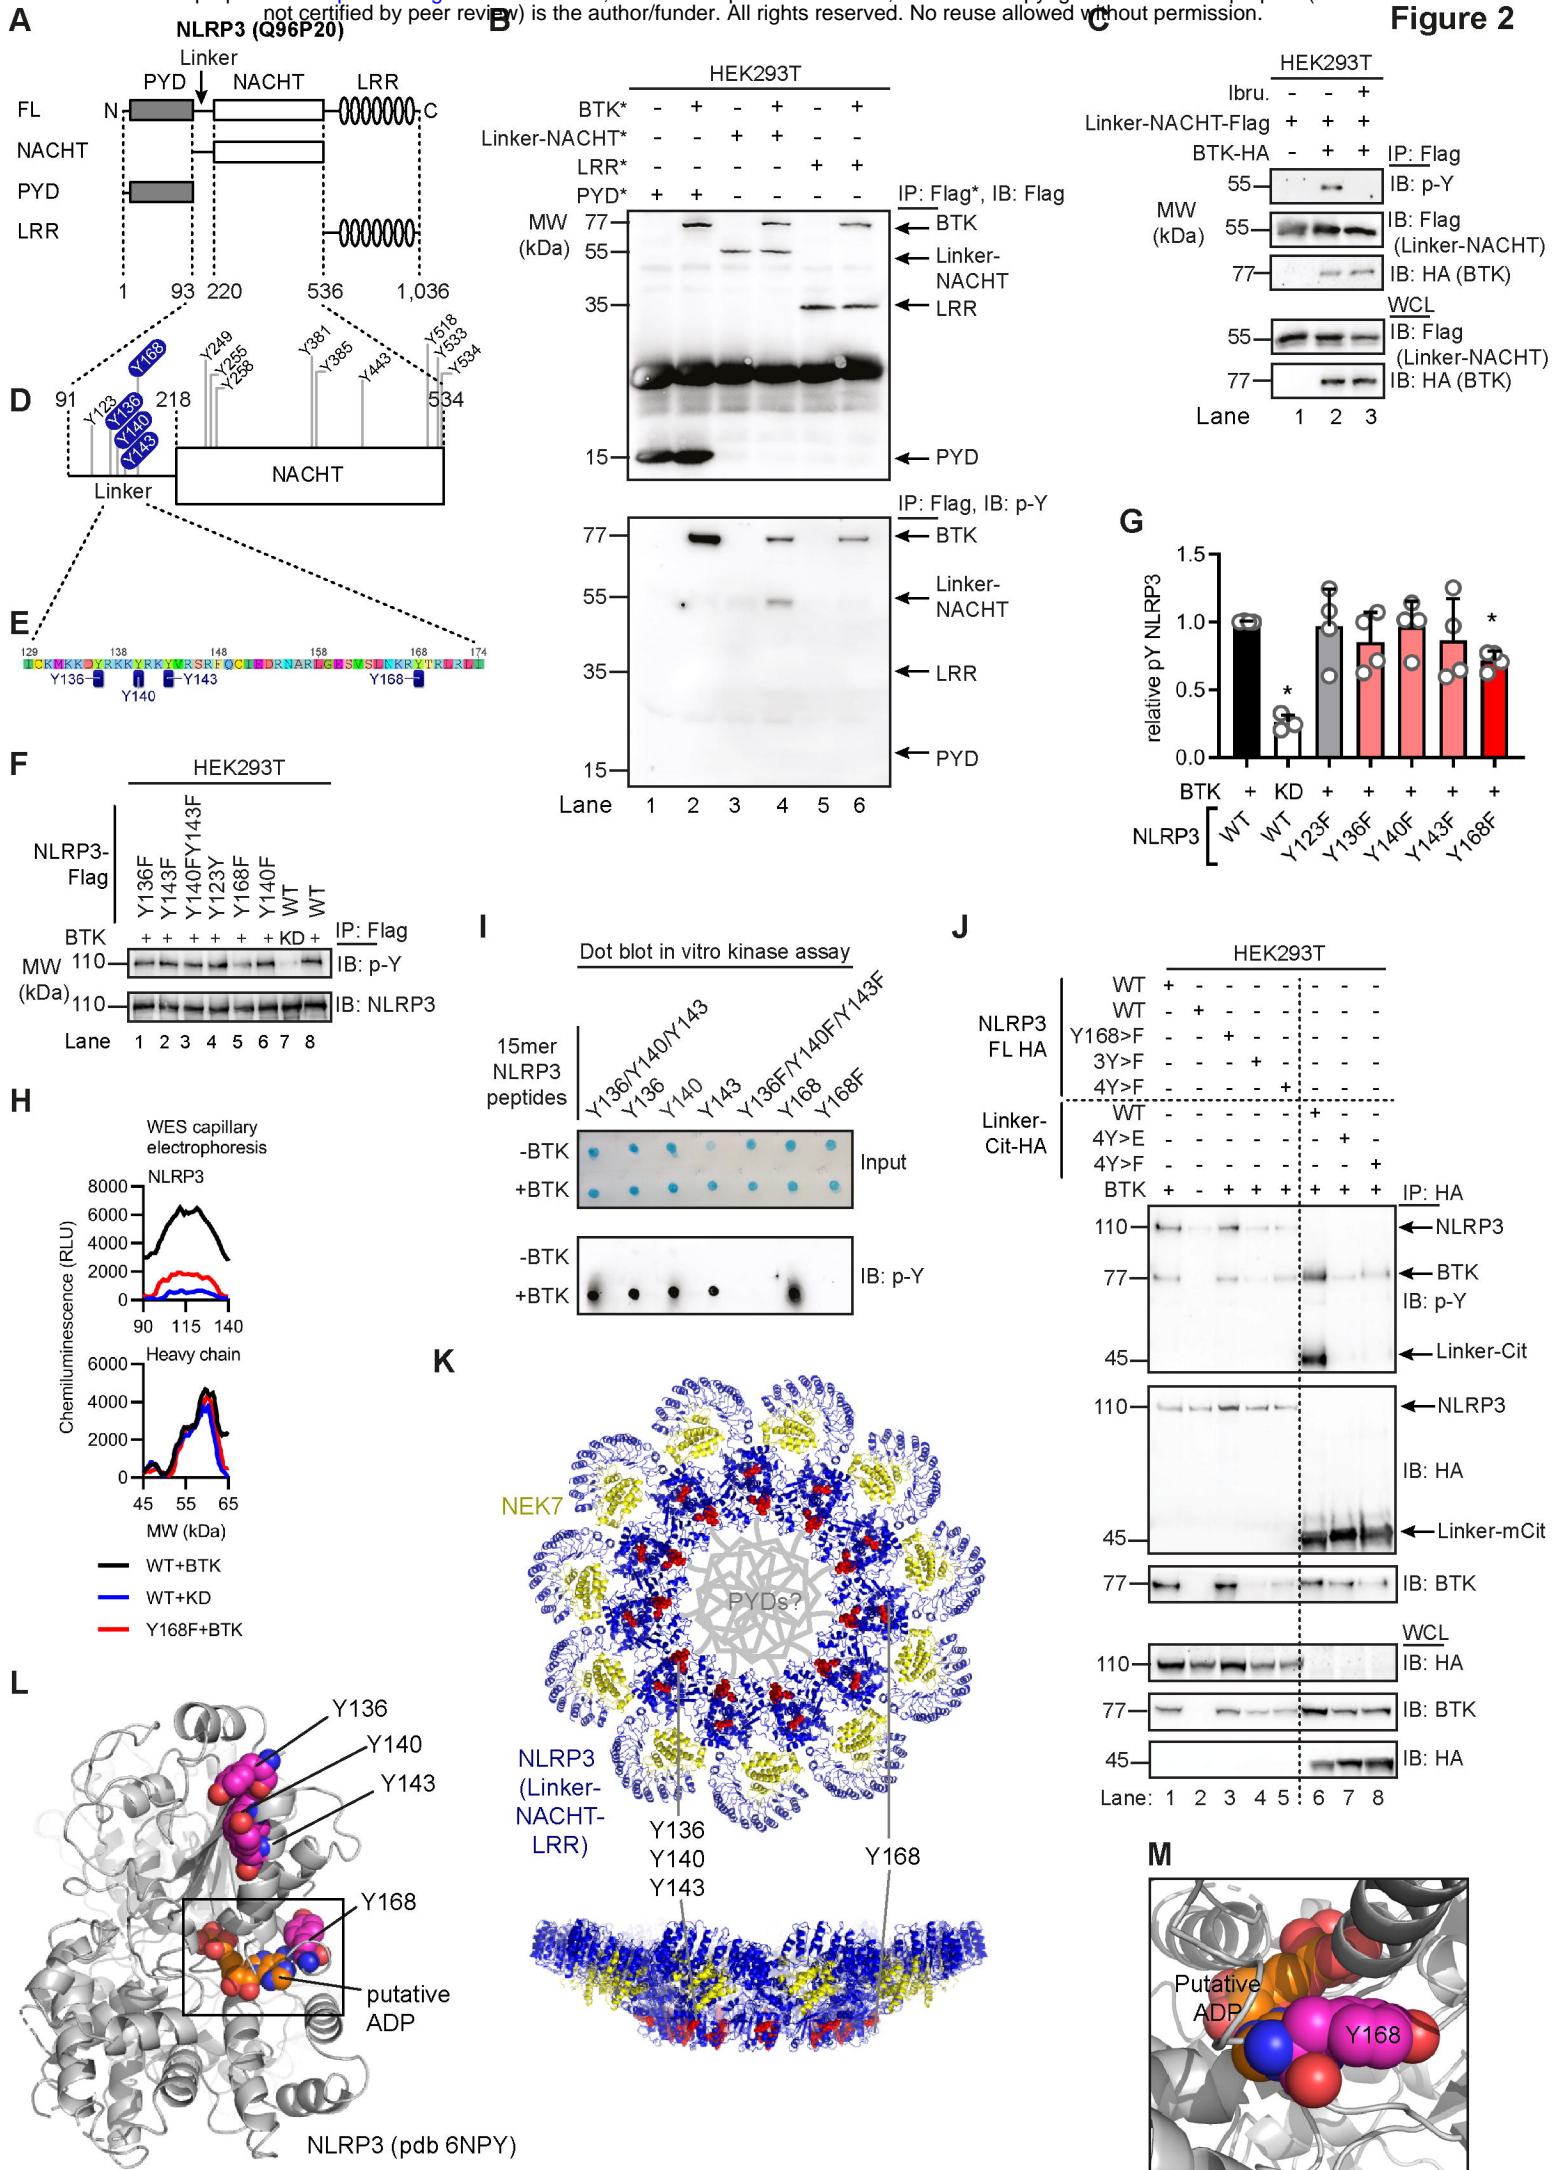



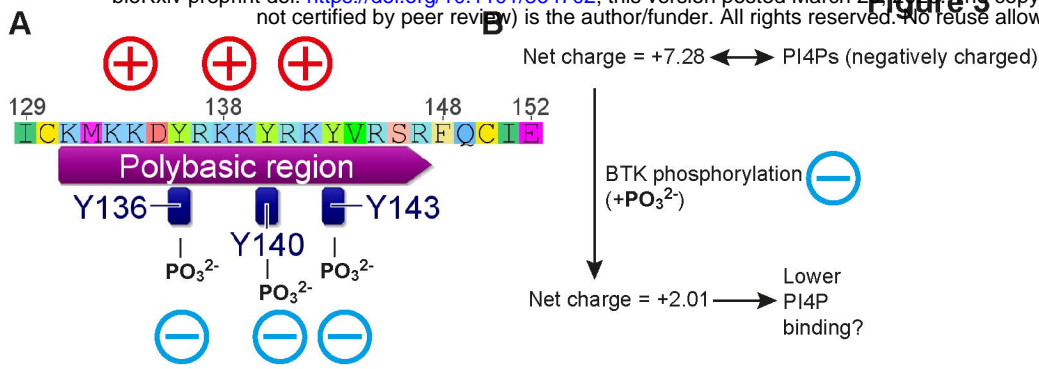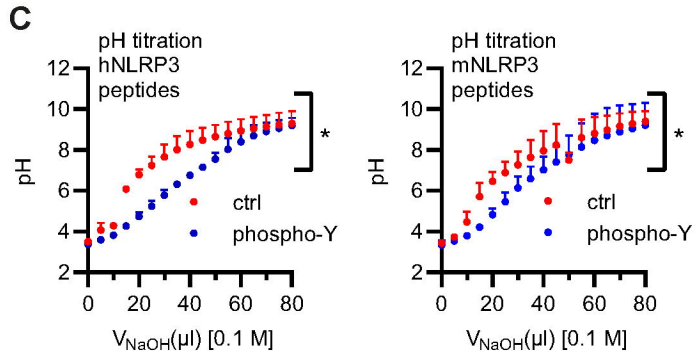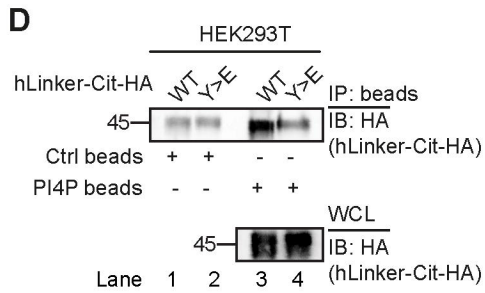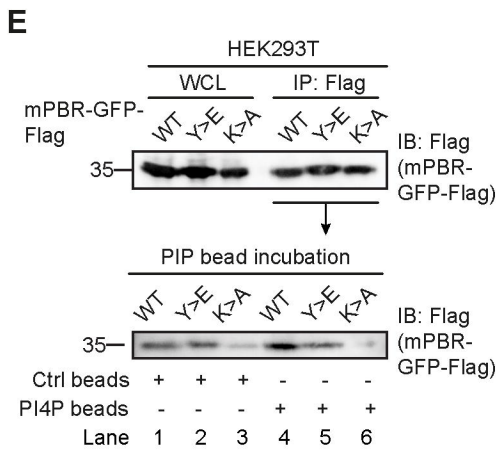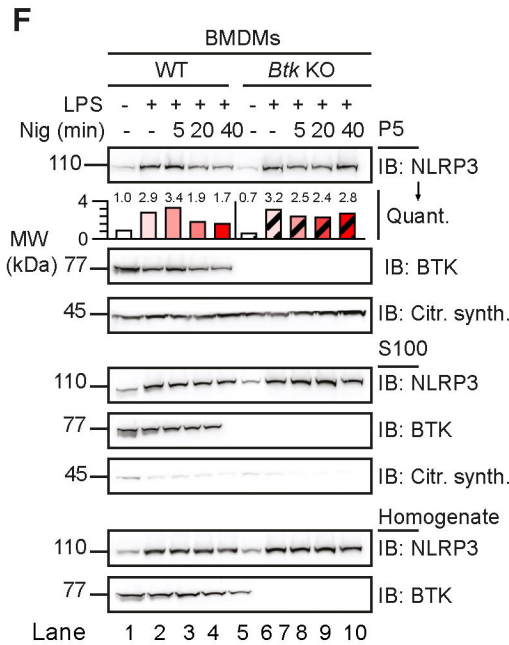

A

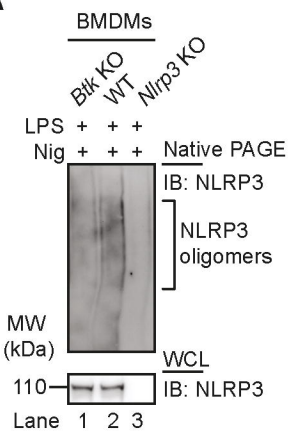

B

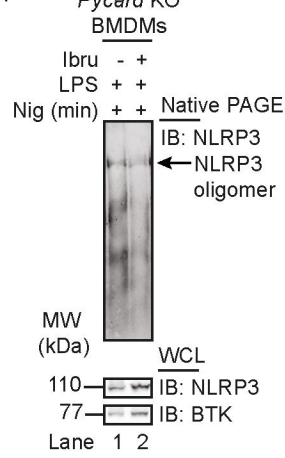

C

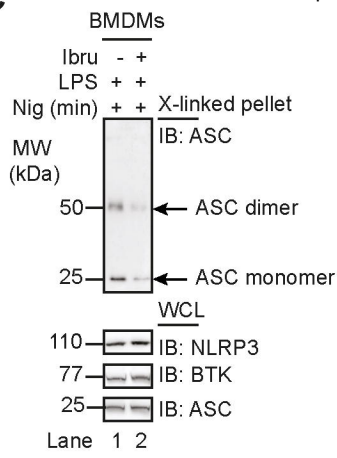

D

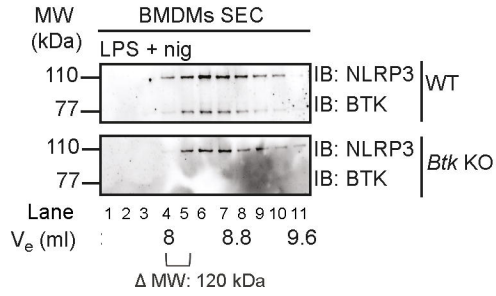

E

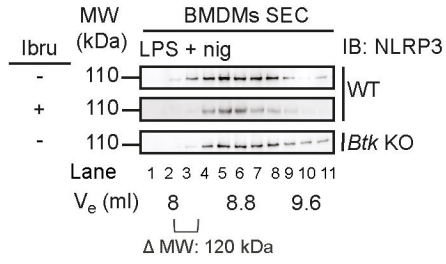

F

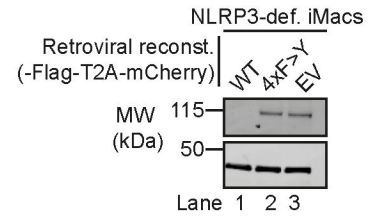

G

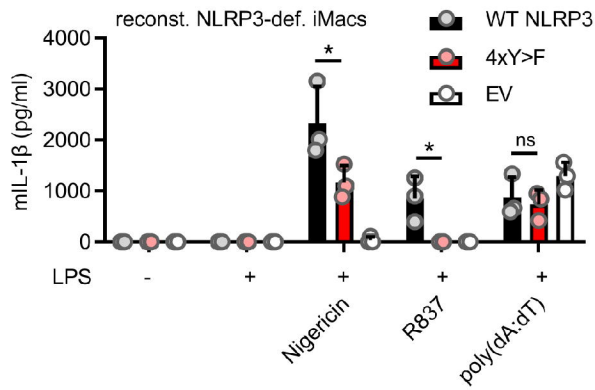

H

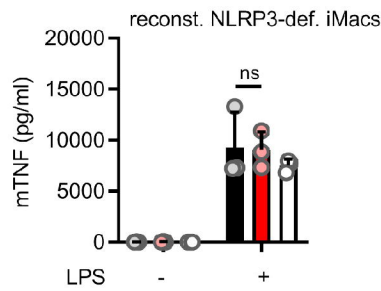

Source: https://www.biorxiv.org/content/10.1101/864702v2.full.pdf
