# Supplementary material for: BTK operates a phospho-tyrosine switch to regulate NLRP3 inflammasome activity
Source: bioRxiv or medRxiv preprint supplement (doi:10.1101/864702), 2020-06-25

**Figure S1**

**A**

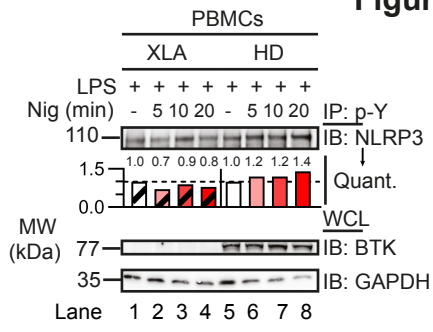

**B**

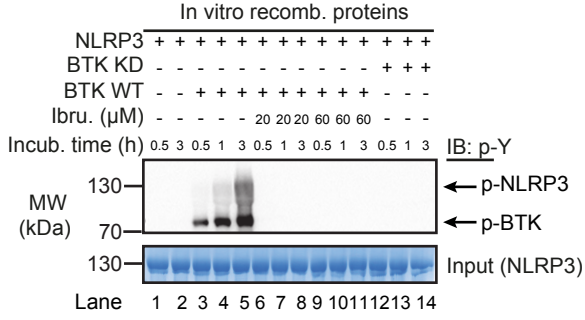

**C**

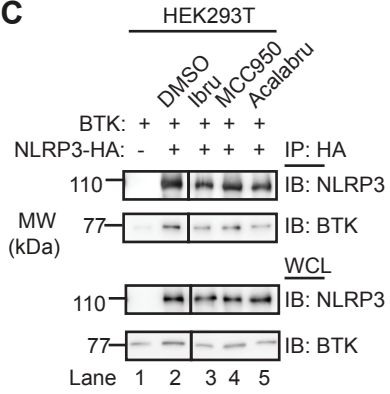

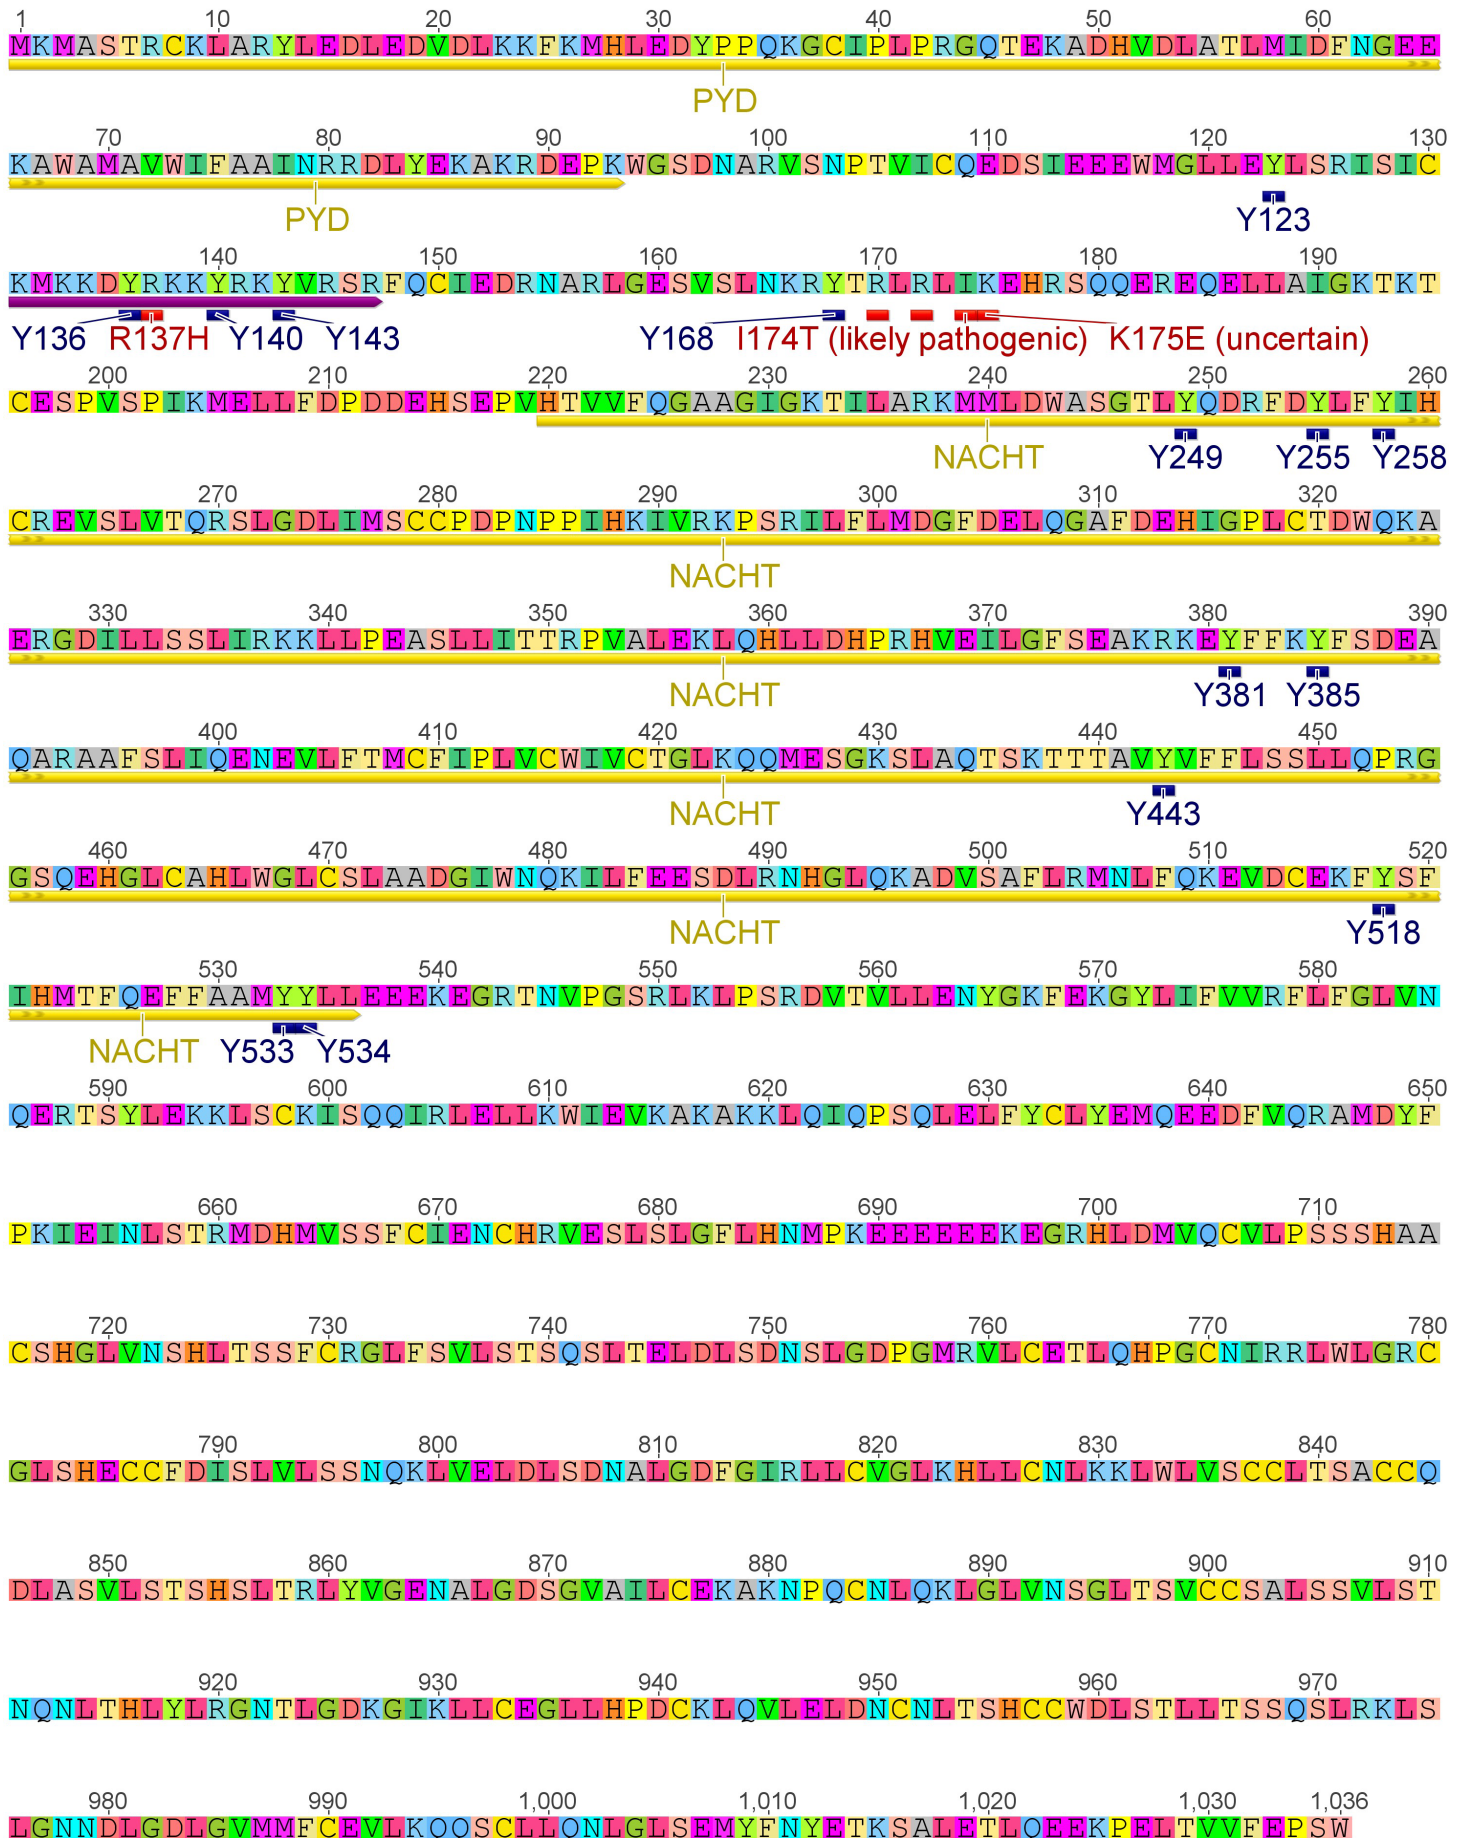



**A**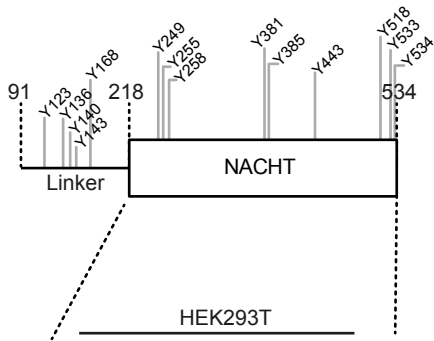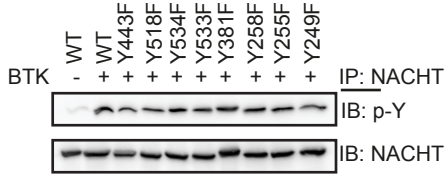**B**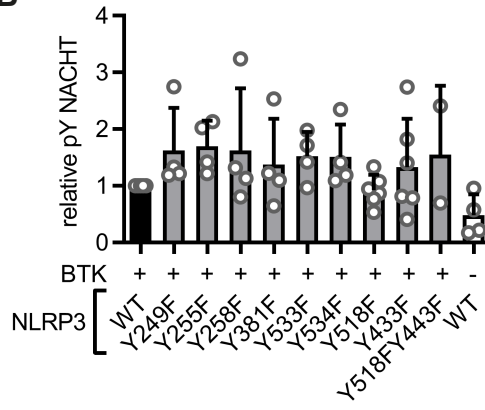**C****Figure S3**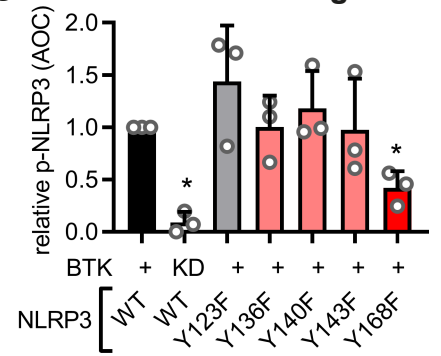**D**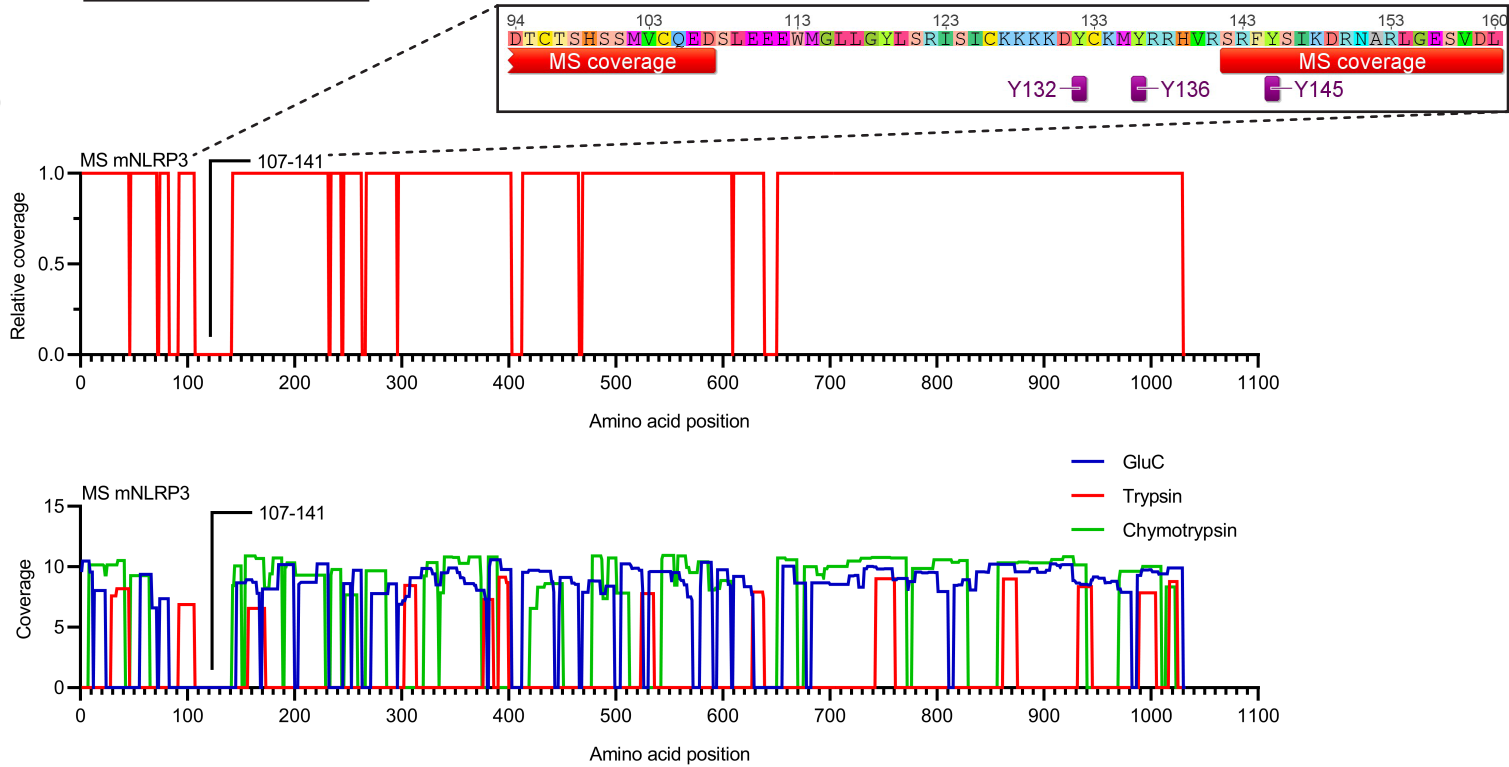**E**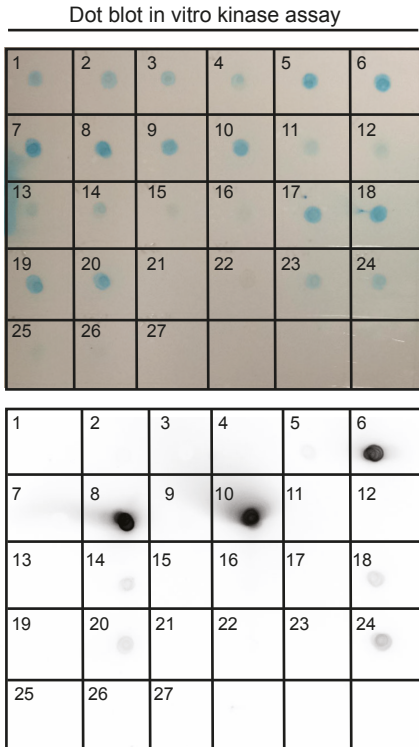

1: Y84 AINRRDL**Y**EKAKRDE  
 3: 123 EWMGLLE**Y**LSRISIC  
 5: Y136 ICKMKKD**Y**RKK**Y**R**Y**  
 7: Y140 KKD**Y**RKK**Y**R**Y**VRSR  
 9: Y168 SVSLNK**Y**TRLRLIK  
 11: Y249 DWASGTL**Y**QDRFD**Y**L  
 13: Y255 **L**YQDRFD**Y**LF**Y**IHCR  
 15: Y258 DRFD**Y**LF**Y**IHCREVS  
 17: Y381 SEAKRKE**Y**FF**Y**FSD  
 19: Y385 RKEYFF**Y**K**Y**FSDEAQA  
 21: Y443 SKTTTAV**Y**VFFLSSL  
 23: Y518 EVDCEK**Y**SFIHMTF  
 25: Y533Y534 QEFFAAM**Y**YLLLEEK

2: Y84 + BTK  
 4: 123 + BTK  
 6: Y136 + BTK  
 8: Y140 + BTK  
 10: Y168 + BTK  
 12: Y249 + BTK  
 14: Y255 + BTK  
 16: Y258 + BTK  
 18: Y381 + BTK  
 20: Y385 + BTK  
 22: Y443 + BTK  
 24: Y518 + BTK  
 26: Y533Y534 + BTK  
 27: BTK only

**F**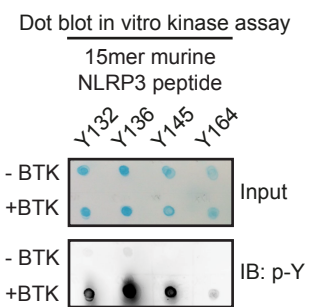

A

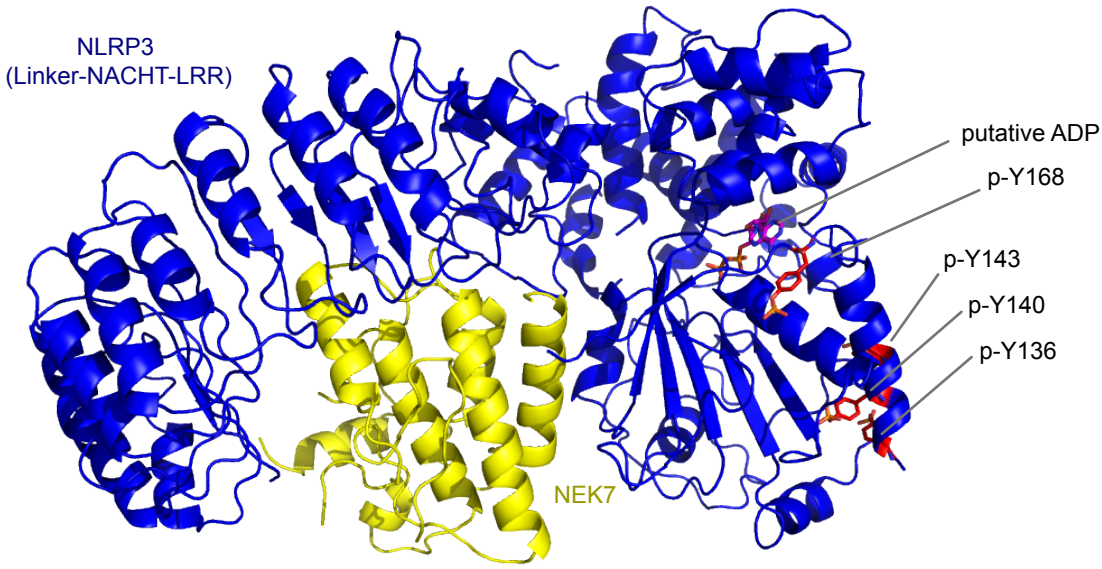

B

|                           | Y136                                                                                  | Y140 | Y143 | Y168 |
|---------------------------|---------------------------------------------------------------------------------------|------|------|------|
| NLRP3_MOUSE (125-167)     | I C K K K K D Y C K M Y R R H V R S R F Y S I K D R N A R L G E S V D L N S R Y T O L |      |      |      |
| NLRP3_RAT (127-169)       | I C K K K K D Y C K I Y R R H V R S R F Y S I K D R N A R L G E S V D L N R R Y T O L |      |      |      |
| NLRP3_MACAQUE (129-171)   | I C K K K K D Y C K K Y R K Y V R S R F Q C I E D R N A R L G E S V S L N K R Y T R L |      |      |      |
| NLRP3_BUSHBABY (127-169)  | I C K K K K D Y C K K Y R K Y V R S R F Q C I E D R N A R L G E S V S L S R R Y T R L |      |      |      |
| NLRP3_HUMAN (129-171)     | I C K M K K D Y R K K Y R K Y V R S R F Q C I E D R N A R L G E S V S L N K R Y T R L |      |      |      |
| NLRP3_RABBIT (125-167)    | I C T K R K D Y C K K Y R K H V R S R F Q C I E D R N A R L G E S V N L N K R Y T R L |      |      |      |
| NLRP3_DOG (120-162)       | I C K K K K D Y C K K Y K K H V R S R F Q C I K D R N A R L G E T V N L N K R Y T R L |      |      |      |
| NLRP3_CAT (122-164)       | I C K K K K D Y C K K Y K K H V R S R F Q C I K D R N A R L G E S V N L N K R Y T R L |      |      |      |
| NLRP3_FERRET (122-164)    | I C K K R K D Y C K K Y K K H V R S R F Q C I K D R N A R L G E S V N L N K R Y T R L |      |      |      |
| NLRP3_BOVIN (124-166)     | I C R K K K D Y C K K Y R K Y V R S K F Q C I K D R N A R L G E S V N L N K R E T R L |      |      |      |
| NLRP3_PIG (124-166)       | I C K K K K D Y C K K Y R K H V R S R F Q C I K D R N A R L G E S V N L N K R E T R L |      |      |      |
| NLRP3_BAT (126-168)       | I C K K K E D Y C K K Y R N H V R S R F Q Y I K D R N A R L G E S V N L N K R Y T R L |      |      |      |
| NLRP3_GUINEAPIG (120-162) | V C R R K K D E G R A Y R R H V R S R F H C I E D R N A R L G E S V N L N K R Y T R L |      |      |      |

**A**

'Hypothetically active' dimer (not to scale)

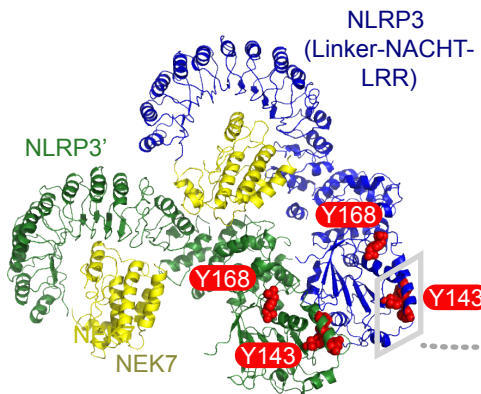Surface charge  
Non-phosphorylated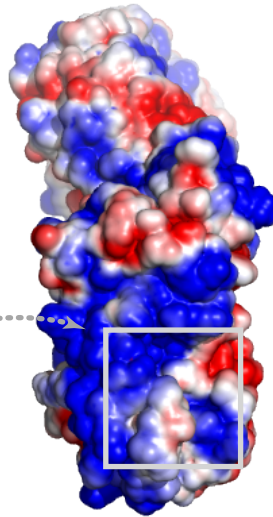BTK  
phosphorylation  
(+PO<sub>3</sub><sup>2-</sup>)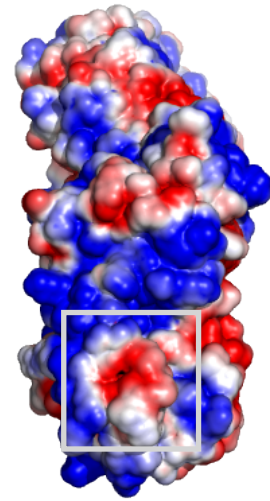**Figure S5**Surface charge  
4x phosphorylated

'Hypothetically active' oligomer (not to scale)

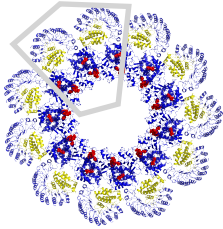**B**

BMDMs - fraction P5 (heavy membranes)

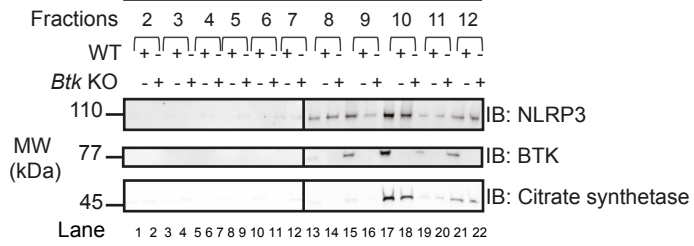

BMDMs - fraction P100 (light membranes)

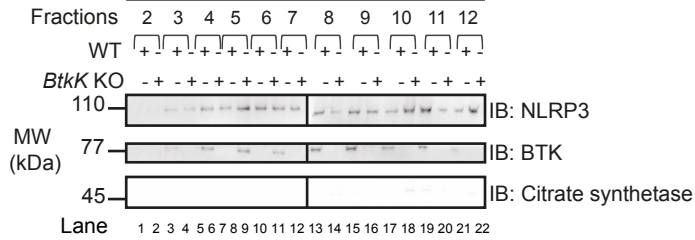

Graphical abstract

Figure S6

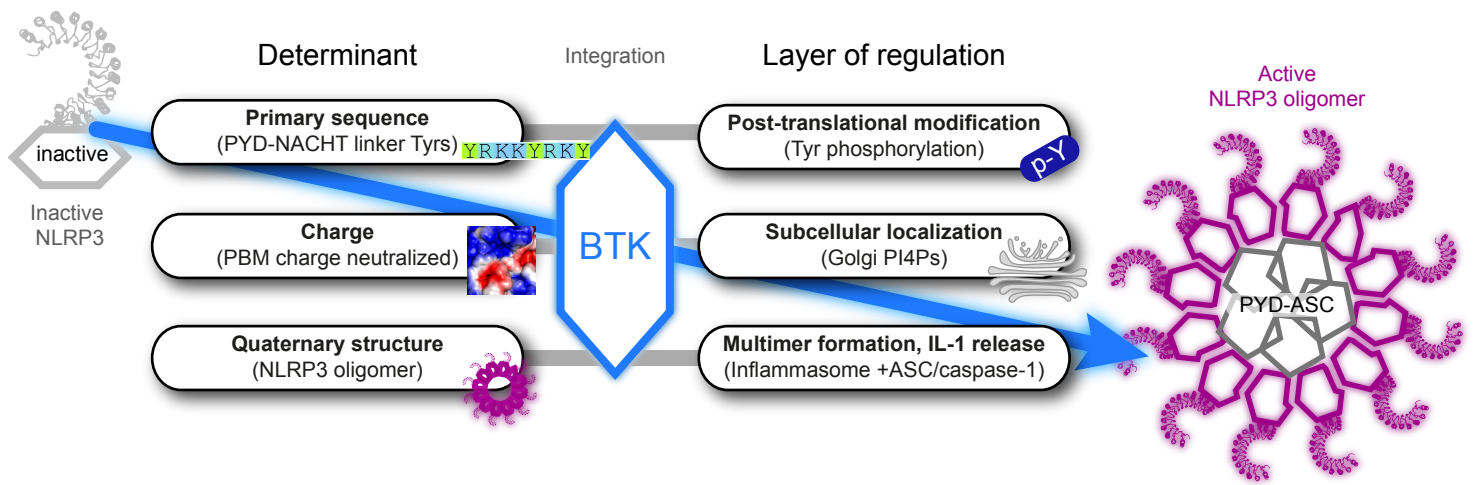

Supplement: Supplementary file [file media-2.pdf]
